## RESEARCH ARTICLE

# Thermal imprinting modifies bone homeostasis in cold-challenged sea bream (*Sparus aurata*)

Ana Patrícia Mateus<sup>1,2</sup>, Rita Costa<sup>1</sup>, Enric Gisbert<sup>3</sup>, Patricia I. S. Pinto<sup>1</sup>, Karl B. Andree<sup>3</sup>, Alicia Estévez<sup>3</sup> and Deborah M. Power<sup>1,\*</sup>

## ABSTRACT

Fish are ectotherms and temperature plays a determinant role in their physiology, biology and ecology, and is a driver of seasonal responses. The present study assessed how thermal imprinting during embryonic and larval stages modified the response of adult fish to low water temperature. We targeted the gilthead sea bream, which develops a condition known as winter syndrome when it is exposed to low water temperatures. Eggs and larvae of sea bream were exposed to four different thermal regimes and then the response of the resulting adults to a low temperature challenge was assessed. Sea bream exposed to a high–low thermal regime as eggs and larvae (HLT; 22°C until hatch and then 18°C until larvae–juvenile transition) had increased plasma cortisol and lower sodium and potassium in response to a cold challenge compared with the other thermal history groups. Plasma glucose and osmolality were increased in cold-challenged HLT fish relative to the unchallenged HLT fish. Cold challenge modified bone homeostasis/responsiveness in the low–high thermal regime group (LHT) relative to other groups, and *ocn*, *ogn1/2*, *igf1*, *gr* and *tra $\beta$*  transcripts were all downregulated. In the low temperature group (LT) and HLT group challenged with a low temperature, alkaline phosphatase (ALP) and tartrate-resistant acid phosphatase (TRAP) activities were decreased relative to unchallenged groups, and bone calcium content also decreased in the LT group. Overall, the results indicate that thermal imprinting during early development of sea bream causes a change in the physiological response of adults to a cold challenge.

**KEY WORDS:** Winter syndrome, Bone remodelling, Development, Phenotypic plasticity, Stress response, Teleost fish

## INTRODUCTION

Fish are ectotherms and their body temperature is in equilibrium with the external thermal conditions (Mozes et al., 2011). This means that changes in ambient water temperature directly affect the cell cycle, metabolism, membrane fluidity and, at the molecular level, influence transcription, translation, post-translational processing and protein structure (Somero, 2010). The overall effect of temperature is apparent as an overt change in whole animal physiology such as growth rate, feeding rate and body composition (Clarke and Johnston, 1999; Greene and Selivonchick, 1987; Wang

et al., 1987; Wiegand et al., 1988). Temperature therefore plays a determinant role in fish physiology, biology and ecology, and is a driver of seasonal responses (Mozes et al., 2011; Somero, 2005). Gilthead sea bream (*Sparus aurata*) is eurythermal and in the wild is exposed to a broad range of ambient water temperatures (11–26°C), and behavioural thermoregulation allows them to avoid temperature extremes (Davis, 1988).

Aquaculture production of the gilthead sea bream is concentrated in the Mediterranean, from Turkey to Spain ([www.feap.info/shortcut.asp?FILE=1402](http://www.feap.info/shortcut.asp?FILE=1402)) and, because fish are caged, they are unable to avoid seasonal fluctuations in water temperature (Tattersall et al., 2012; Tort et al., 2011). Under aquaculture conditions, a prolonged winter with water temperatures below 13°C often leads to mortality of unknown aetiology in sea bream and not strongly associated with a specific pathogen (Padrós et al., 1996; Sarusic, 1999) that has been termed winter syndrome or winter disease (Tort et al., 2011). This syndrome is a multifactorial condition associated with a high but transient (24–48 h) rise in plasmatic levels of cortisol and triggers a classical stress response with the associated secondary effects (Rotllant et al., 2000; Sala-Rabanal et al., 2003). A reduction in food intake (Rotllant et al., 2000; Tort et al., 2004) or starvation (Ibarz et al., 2003, 2005, 2007) occurs and fish affected by winter syndrome become lethargic. Immunocompetence is also severely depressed (Berthe et al., 1995; Doménech et al., 1997; Tort et al., 1998; Vargas-Chacoff et al., 2009), osmoregulatory capacity is impaired (Ibarz et al., 2010a), and histopathological changes occur in the liver, exocrine pancreas, digestive tract and muscle (Gallardo et al., 2003; Ibarz et al., 2010a, b; Sala-Rabanal et al., 2003). Despite the efforts to understand how fish cope with winter syndrome and the mechanisms underlying this disease, no consideration has been given to how variation in water temperature during early ontogeny might modulate the response of fish to environmental stressors in adult life, specifically to a cold water challenge.

Bone plays an important role in plasma ion homeostasis, is intimately linked to muscle growth, and is essential for load bearing and movement (Hall, 2005). Nonetheless, the impact of temperature on bone is largely unexplored, although evidence exists that low temperature causes metabolic changes (in plasma ions and starvation) that can influence bone homeostasis (Doherty et al., 2015; Takagi, 2001; Vieira et al., 2013). However, the impact of winter syndrome on bone homeostasis and potentially calcium balance and malformations is unstudied.

Recently, considerable interest has been focused on determining the impact of thermal imprinting during embryonic and larval stages on the phenotypic plasticity of adult fish in part as a response to growing concern about the likely impact of global warming (Somero, 2005; Wood and McDonald, 1997). Thermal imprinting in early stages has a persistent effect on gene expression in subsequent stages (García de la Serrana et al., 2012; Johnston et al.,

<sup>1</sup>Centro de Ciências do Mar (CCMAR), Grupo de Endocrinologia Comparativa e Biologia Integrativa, Universidade do Algarve, Campus de Gambelas, 8005-139 Faro, Portugal. <sup>2</sup>Escola Superior de Saúde, Universidade do Algarve, Av. Dr. Adelino da Palma Carlos, 8000-510 Faro, Portugal. <sup>3</sup>IRTA-SCR, Unitat de Cultius Aqüícoles, Crta. Poble Nou km 5,5, 43540 Sant Carles de la Ràpita, Spain.

\*Author for correspondence (dpower@ualg.pt)

 D.M.P., 0000-0003-1366-0246

**List of symbols and abbreviations**

|                   |                                       |
|-------------------|---------------------------------------|
| HLT               | high–low temperature                  |
| HSI               | hepatosomatic index                   |
| HT                | high temperature                      |
| K                 | condition factor                      |
| LHT               | low–high temperature                  |
| LT                | low temperature                       |
| OCN               | osteocalcin                           |
| OGN               | mimiccan/osteoglycin                  |
| pNP               | para-nitrophenol                      |
| pNPP              | para-nitrophenyl phosphate            |
| TR $\alpha/\beta$ | thyroid receptors $\alpha$ or $\beta$ |

2009; Jonsson and Jonsson, 2014; Scott and Johnston, 2012), and gene methylation and non-coding RNA have been suggested to contribute to the effect of temperature on developmental plasticity (Bizuayehu et al., 2015; Campos et al., 2014). Evidence has been gathered revealing that the thermal regime during early development can influence the juvenile stress response (Auperin and Geslin, 2008; Varsamos et al., 2006), muscle growth (Alami-Durante et al., 2007; Galloway et al., 1999; Garcia de la Serrana et al., 2012; Johnston et al., 2009; Macqueen et al., 2008; Steinbacher et al., 2011), and the incidence and character of skeletal deformities (Boglione and Costa, 2011). However, little is known about how embryonic or larval temperature regimes affect the ability of fish to cope with temperature changes in adult life. It is known that thermal imprinting in zebrafish (*Danio rerio*) embryos induces modified thermal tolerance in juveniles exposed to higher than normal culture temperatures (Schaefer and Ryan, 2006), but the effect of temperature during development on the physiological response to cold in adults is unstudied. In addition, the impact of early life temperatures on bone homeostasis have not previously been studied in adult teleost fish. Most of the studies that exist have looked at the effect of increased temperature on skeletal development in species such as tilapia (Campinho et al., 2004), European sea bass *Dicentrarchus labrax* (Koumoundouros et al., 2001), Atlantic salmon (Takle et al., 2005) and gilthead sea bream (Boglione and Costa, 2011), or how it affects the incidence of malformations, an issue of importance to aquaculture (Boglione et al., 2013; Koumoundouros, 2010).

Taking into consideration the role of temperature on thermal imprinting and subsequent performance of juveniles and adults, and the known vulnerability of the skeleton to temperature-induced changes in larvae (Divanach et al., 1996; Polo et al., 1991; Sfakianakis et al., 2011), we hypothesized that early thermal history from embryogenesis through the larvae–juvenile transition might influence the response of bone in adults to changes in water temperature characteristic of winter. To test this hypothesis, adult fish with different thermal histories were exposed to a cold challenge typical of that experienced during winter. Because activation of the stress axis has previously been reported in winter syndrome (Rotllant et al., 2000), we assessed the response of adult fish with different thermal histories to a temperature drop by measuring plasma parameters associated with the stress response. The impact of thermal imprinting on bone metabolism during the temperature challenge was assessed by analysis of osteoblast and osteoclast activity by measuring the enzymatic activity of alkaline phosphatase (ALP; Dimai et al., 1998) and tartrate-resistant acid phosphatase (TRAP; Persson et al., 1995), respectively, and determining the ash and calcium content of bone and the abundance of transcripts associated with the bone matrix. To

assess whether part of the effect of thermal imprinting occurred through modification of factors that regulate bone responsiveness, we analyzed the relative gene expression of regulatory factors such as insulin-like growth factor 1 (*igf1*), glucocorticoid receptor (*gr*) and thyroid receptors in bone (*tra* and *tr $\beta$* ). Overall, the objective of the study was to assess whether thermal regime during sea bream development could influence the physiological response of young adults to a cold water challenge.

**MATERIALS AND METHODS****Early life programming**

All the procedures of early life temperature treatments and stress challenge were performed at the Institute for Aquaculture and Food Technology Research (IRTA), St Carles de la Ràpita, Spain, in a temperature-controlled seawater recirculation system (IRTAMar™). All animal handling procedures were approved by the Ethics and Animal Care Committee (4998-T9900002) and complied with the guidelines of the European Union Council (86/609/EU), and Spanish and Catalan governments' legislation.

Detailed information about the thermal-imprinting experiments are provided in Garcia de la Serrana et al. (2012). In brief, fertilized eggs of gilthead sea bream (*Sparus aurata* Linnaeus 1758) (fertilization rate=92%) were maintained at two different temperatures during embryogenesis, 18°C [low temperature (LT)] or 22°C [high temperature (HT)] in two independent temperature-controlled seawater recirculation systems. The two systems included two tanks of 2 m<sup>3</sup> and each contained two incubators (30 l) containing 110 ml of fertilized eggs. At hatching, larvae from replicate incubators within each temperature treatment were pooled, because no differences in hatching rate were observed, and they were then subdivided to generate the four different temperature regimes (two replicate tanks/group; Fig. 1A). The temperature regimes were selected considering the two extreme temperatures of the optimal range for early life development of gilthead sea bream (18 and 22°C) (Baeverfjord et al., 2010; Mozes et al., 2011): (i) 18°C from egg incubation through to hatching and up until larvae–juvenile transition (LT); (ii) 22°C from egg incubation through to hatching and up until larvae–juvenile transition (HT); (iii) 18°C from egg incubation up until hatching and then 22°C until larvae–juvenile transition [low–high temperature (LHT)]; (iv) 22°C from egg incubation through to hatching and then 18°C up until larvae–juvenile transition [high–low temperature (HLT)]. All treatment groups of juvenile fish were then maintained for 7 months in duplicate 2 m<sup>3</sup> tanks per group, in a semi-closed recirculating seawater system with 5–10% water renewal each week, under a constant water temperature regime (21–22°C). Juvenile fish were fed five times per day at 3% body mass with a commercial diet (OptiBream™).

A relatively large stock of thermally imprinted fish (adult fish in which the eggs and larvae were reared under different temperature regimes, approx. 700–900 per thermal regime) were generated and were used for several independent experiments (Garcia de la Serrana et al., 2012; Mateus et al., 2017). Fish used for the present cold-challenge experiment were age matched (7 months post-hatch). Potential sex-related differences were not expected because the sea bream is a hermaphrodite and during the first year mature as males (Pinto et al., 2006; Zohar et al., 1978). However, significant differences in mass and length existed between fish from the different thermal regimes ( $P<0.001$ ; Table 1). The biometric differences detected in the present study between thermally imprinted fish were confirmed in a subsequent stress-challenge experiment performed with 9-month post-hatch sea bream from the same stock of fish (Mateus et al., 2017).

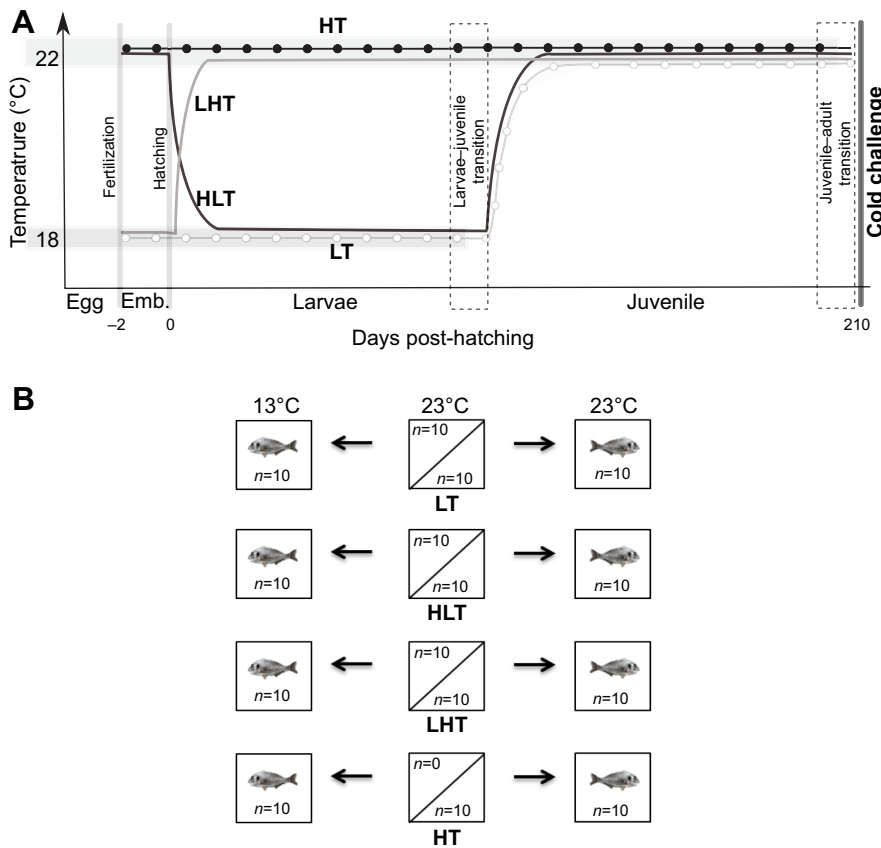

**Fig. 1.** Schematic representation of the temperature regimes that gilthead sea bream were exposed to from egg fertilization to larvae–juvenile transition until the cold challenge.

(A) Four temperature treatments (thermal groups) during the egg incubation phase and larval rearing were generated, two with constant temperatures [LT, low temperature (18°C); HT, high temperature (22°C)] and two with variable temperatures [HLT, high–low temperature (22–18°C); LHT, low–high temperature (18–22°C)]. Fish from all thermal groups were maintained at a common temperature (22±1°C) from the larvae–juvenile transition (when the body was covered with scales) for 7 months until the beginning of the cold challenge. (B) The cold challenge was performed by randomly dividing each group of fish for a thermal regime into two groups. The control group was maintained in replicate tanks at 23°C ( $n=10$ /thermal history group). Fish were subjected to these temperatures for 15 days until sampling.

### Cold challenge and sampling

To assess whether thermal imprinting could modify the physiological response of young-adult sea bream subjected to a cold water challenge, duplicate tanks of fish from each thermal regime (LT, LHT, HT and HLT) were randomly divided into two groups: the water temperature of the control groups was 23.0±1.0°C and the cold-challenge groups was 13.0±1.0°C (Fig. 1B). Water temperature was progressively reduced at a rate of 1°C per day, until the target temperature, 13°C, was attained. Sea bream [ $n=10$  group<sup>-1</sup> tank<sup>-1</sup>; see Table 1 for data on body mass, length, condition factor ( $K$ ) and hepatosomatic index (HSI)] were exposed to reduced water temperature for 15 days. The circuit consisted of 200 l fibreglass tanks in a semi-closed seawater system at pH 7.5–8.0, 35–36‰ salinity and >80% oxygen saturation, and maintained under a 12 h:12 h light:dark photoperiod. Fish were fed to satiation and this corresponded to approximately 3% body mass daily using a commercial diet (OptiBream™) for the control groups

and 1% body mass daily for the cold challenge because they would not eat more due to the cold stress. Uneaten food was siphoned daily from the bottom of the experimental tanks.

For sampling, fish were killed with an overdose (450 ppm) of 2-phenoxyethanol (Sigma-Aldrich, St Louis, MO, USA), blotted dry and blood collected from the caudal vein using a heparinized syringe, centrifuged at 7000  $g$  for 4 min at 4°C, and the plasma stored at –20°C. Haemal vertebrae (bone) were collected into RNAlater for subsequent RNA extraction, enzymatic assays, and calcium and mineral content analysis. Vertebrae samples were incubated overnight at 4°C in RNAlater and then stored at –80°C until analysis.

### Plasma analyses

Plasma cortisol (ng ml<sup>-1</sup>) was measured in duplicate using a validated radioimmunoassay (RIA; Rotllant et al., 2005). Plasma osmolality (mmol kg<sup>-1</sup>) was determined using a vapor pressure

**Table 1.** Biometric parameters

| Thermal history | Mass (g)                |                         | Standard length (cm)   |                          | HSI (%) |                          | $K$       |                        |
|-----------------|-------------------------|-------------------------|------------------------|--------------------------|---------|--------------------------|-----------|------------------------|
|                 | 23°C                    | 13°C                    | 23°C                   | 13°C                     | 23°C    | 13°C                     | 23°C      | 13°C                   |
| LT              | 110.7±13.9 <sup>a</sup> | 100.3±6.8 <sup>a</sup>  | 14.7±0.76 <sup>a</sup> | 14.2±0.55 <sup>a</sup>   | 1.6±0.4 | 2.2±0.4 <sup>a,***</sup> | 3.88±0.33 | 3.54±0.24 <sup>*</sup> |
| LHT             | 172.5±21.4 <sup>b</sup> | 179.1±18.8 <sup>b</sup> | 17.0±0.93 <sup>b</sup> | 17.1±0.67 <sup>b</sup>   | 1.4±0.2 | 1.8±0.3 <sup>b,***</sup> | 3.62±0.32 | 3.46±0.24              |
| HT              | 149.0±16.9 <sup>c</sup> | 143.2±21.8 <sup>c</sup> | 15.9±0.79 <sup>c</sup> | 15.7±1.02 <sup>c</sup>   | 1.5±0.2 | 2.6±0.3 <sup>c,***</sup> | 3.83±0.07 | 3.67±0.28              |
| HLT             | 109.1±21.7 <sup>a</sup> | 123.3±15.8 <sup>c</sup> | 14.6±0.98 <sup>a</sup> | 15.1±0.78 <sup>a,c</sup> | 1.3±0.3 | 2.2±0.3 <sup>a,***</sup> | 3.82±0.22 | 3.67±0.54              |

Summary of body and liver mass combined (g), standard length (cm), hepatosomatic index [HSI; 100×(liver mass/body mass)] and condition factor [ $K$ ; 100×(body mass/total length<sup>3</sup>)] of gilthead sea bream exposed to different thermal regimes during egg and larval stages and then maintained at the control temperature (23±1°C;  $n=10$ /group; control) or exposed to a temperature drop to 13±1°C ( $n=10$ /group). Different letters indicate significant differences for a given parameter between fish with a different thermal history maintained at the same temperature. Asterisks denote significant differences between fish with the same thermal history maintained at different temperatures (23 or 13°C): \* $P<0.05$ ; \*\* $P<0.01$ ; \*\*\* $P<0.001$ . The results are shown as means±s.d.; two-way ANOVA;  $P<0.05$ . LT, low temperature (18°C); LHT, low–high temperature (18–22°C); HT, high temperature (22°C); HLT, high–low temperature (22–18°C).



osmometer (Vapro 5520, Wescor, Logan, UT, USA), and sodium ( $\text{Na}^+$ ) and potassium ( $\text{K}^+$ ) concentrations were determined by flame photometry (BWB Technologies, USA) and the results expressed in  $\text{mmol l}^{-1}$  ( $n=10/\text{group}$ ).

Plasma glucose ( $\text{mmol l}^{-1}$ ) and total calcium ( $\text{Ca}^{2+}$ ;  $\text{mmol l}^{-1}$ ) were measured with glucose oxidase/peroxidase and *o*-Cresolphthalein colourimetric assays, respectively (Spinreact 1001190 and 1001061, Barcelona, Spain). Total protein ( $\text{mg ml}^{-1}$ ) was measured in diluted plasma samples (1:40) using a colorimetric assay (#500-0006, Bio-Rad, Hercules, CA, USA) and a standard curve prepared using bovine serum albumin (Quick Start BSA Standard Set, #500-0207, Bio-Rad). Analysis of the colourimetric assays was performed using a microplate reader (Benchmark, Bio-Rad) set at the appropriate wavelength (510 nm for glucose, 570 nm for  $\text{Ca}^{2+}$  and 595 nm for protein).

### Bone TRAP and ALP activities

TRAP and ALP activities were measured as described in Guerreiro et al. (2013). Samples of frozen vertebrae ( $n=10/\text{group}$ ) were crushed and then 8–12 mg used for each assay. Two-hundred  $\mu\text{l}$  of 20  $\text{mmol l}^{-1}$  tartrate in NaAc buffer (0.1  $\text{mol l}^{-1}$ , pH 5.3) was added to 8–12 mg of crushed vertebra and used to determine the TRAP activity. To determine the ALP activity, 200  $\mu\text{l}$  of 0.1  $\text{mol l}^{-1}$  Tris-HCl (pH 9.5), 1  $\text{mmol l}^{-1}$   $\text{MgCl}_2$  and 0.1  $\text{mmol l}^{-1}$   $\text{ZnCl}_2$  buffer was added to 8–12 mg of crushed vertebra. Each sample was assayed in duplicate and colour was developed for 20 min at 24°C before addition of 200  $\mu\text{l}$  of the substrate para-nitrophenyl phosphate (pNPP; 5  $\text{mmol l}^{-1}$ ). The reactions were stopped by adding 200  $\mu\text{l}$  of 2  $\text{mol l}^{-1}$  NaOH and the absorbance was measured at 405 nm. A standard curve for para-nitrophenol (pNP) was included in each assay and used to establish the amount of product pNP produced ( $\text{mmol l}^{-1}$ ) and, thus, enzyme activity. TRAP and ALP activities were normalized using bone dry mass and expressed as  $\text{nmol pNP min}^{-1} \text{mg}^{-1}$ .

### Calcium and ash content in bone

Individual crushed vertebrae samples ( $n=10/\text{group}$ ), cleaned of muscle, were dried at 50°C until each registered a constant mass (to the nearest 0.1 mg) in three independent measurements (approximate drying time 48 h). Ash content in vertebrae was determined by incinerating dried samples at 550°C for 14 h and then cooling the ashes in a desiccator and determining their mass (precision of 0.1 mg). The ash content was normalized by the dry mass of bone and expressed as mg. Ash was then digested for 24 h with 70% nitric acid (200  $\mu\text{l mg}^{-1}$  ash) and its calcium content determined using an Agilent Microwave Plasma-Atomic Emission Spectrometer (MP-AES), model 4200 (Agilent Technologies, Santa Clara, CA, USA). Calcium concentrations were measured in each digested sample, diluted 1:1000 in acidic water (5% nitric acid), by comparison with a standard curve ranging from between 0.5 and 10 ppm of calcium (Agilent Calibration Mix Majors 6610030700). Running parameters for MP-AES were pump rate 15 rpm, sample uptake time 70 s, rinse time 40 s, stabilization time 15 s, with 5 replicate readings and the selected options ‘fast pump during uptake’ and ‘rinse time fast pump’ in mode ‘on’. Calcium contents were measured at a wavelength of 393 nm and then expressed as  $\mu\text{mol mg}^{-1}$ .

### Analysis of gene expression by quantitative real-time PCR (qPCR)

Total RNA was extracted from crushed vertebrae ( $n=10/\text{group}$ ) using a Maxwell 16 System (Promega, Madison, WI, USA) and

following the manufacturer’s instructions. The concentrations and quality of the extracted RNA were determined using a NanoDrop1000 Spectrophotometer (Thermo Fisher Scientific, Waltham, MA, USA) and by electrophoresis on 0.8% agarose gels. To eliminate genomic DNA, the total RNA (2–9  $\mu\text{g}$ ) was treated with DNase using a DNA-free kit (Ambion, Loughborough, UK). cDNA synthesis was carried out in a 20  $\mu\text{l}$  reaction volume containing 500 ng of DNase-treated RNA, 200 ng of random hexamers (Jena Biosciences, Jena, Germany), 100 U of RevertAid reverse transcriptase (Fermentas, Thermo Fisher Scientific), 8 U of RiboLockRNase Inhibitor (Fermentas) and 0.5  $\text{mmol l}^{-1}$  dNTPs (GE Healthcare, Madrid, Spain). The reaction mixture was incubated for 10 min at 20°C followed by 50 min at 42°C and the enzyme inactivated by heating for 5 min at 72°C.

qPCR was used to analyze the mRNA expression of a suite of genes characteristic of the bone matrix and associated with its activity [osteocalcin (*ocn*), and mimecan/osteoglycin 1 and 2 (*ogn1* and *ogn2*)] and other genes indicative of a change in bone tissue regulation (*igf1*, *gr*, *tra* and *trb*) (Collins et al., 1998; Moutsatsou et al., 2012; Sbaihi et al., 2007). Duplicate reactions for each individual cDNA were prepared in 15  $\mu\text{l}$ , containing 10 ng of cDNA, 300  $\text{nmol l}^{-1}$  of each specific primer and 1 $\times$  final concentration of EvaGreen (Sso Fast Eva Green Supermix, Bio-Rad Laboratories). In the case of the reference gene, *18s*, only 0.01 ng cDNA was used. PCR reactions were carried out in a StepOnePlus qPCR thermocycler and data was analyzed with StepOne software v2.2 (Applied Biosystems, Loughborough, UK). qPCR cycling conditions were 30 s at 95°C, 40 cycles of 5 s at 95°C and 10 s at 60°C followed by a final melt curve between 60 and 95°C, which gave single products/dissociation curves in all reactions. Specific primers for each transcript were designed using Primer Premier 5.0 software (Premier Biosoft Int., Palo Alto, CA, USA). Primer sequences, amplicon size, amplicon melting temperature, reaction efficiency,  $R^2$  and the accession number of genes are listed in Table 2. Standard curves relating amplification cycle to initial template quantity (in copy number, calculated as in Vieira et al., 2012) were generated using serial dilutions of purified and quantified target amplicons. All amplicons were sequenced to confirm qPCR specificity. Control reactions included a no-template control and a cDNA synthesis control (reverse transcriptase omitted).

Several reference genes were tested ( $\beta$ -actin, ribosomal protein S18 and 18S ribosomal RNA subunit) and *18s* was selected because it did not vary significantly between cDNA samples of vertebrae from adults used in the cold-challenge experiment. Relative expression levels were calculated by dividing the detected copy number of the target genes by the reference gene. Results are expressed as  $\log_2$  fold-change and were calculated relative to the control group, which was defined as the experimental animals obtained from larvae maintained at 18°C from egg until the larvae–juvenile transition, because this is the temperature regime frequently used for gilthead sea bream larval rearing (Mozes et al., 2011). The comparisons made and the strategy for statistical analysis is indicated below.

### Statistical analysis

All statistical analysis was performed using the SPSS 22.0 software package (SPSS Inc., Chicago, IL, USA) with statistical significance taken at  $P<0.05$ . No significant tank effects were detected and the results for the samples from the duplicate tanks were pooled for statistical analysis (Student’s *t*-test). Two-way analysis of variance (two-way ANOVA) was used to assess the interaction between thermal history and the water temperature during the cold-challenge

**Table 2. Primers used for gene expression analysis by quantitative RT-PCR**

| Gene symbol    | Accession no./reference | Primer sequence (5'–3')                                  | Amplicon length (bp) | T (°C) <sup>a</sup> | Efficiency (%) <sup>b</sup> | R <sup>2</sup> |
|----------------|-------------------------|----------------------------------------------------------|----------------------|---------------------|-----------------------------|----------------|
| <i>ocn</i>     | AF289506                | F: TCCGCAGTGGTGAGACAGAAG<br>R: CGGTCCGTAGTAGGCCGTGTAG    | 150                  | 60                  | 99                          | 0.991          |
| <i>gr</i>      | DQ486890                | F: CCATCACCTCTGCCGCATCTG<br>R: CTGGAGGAAGTCTGCTGAACC     | 195                  | 64                  | 84                          | 0.994          |
| <i>ogn1</i>    | KM603667                | F: GAAGTCTCTTATTACCTGT<br>R: CAAAGGGTCACTGAAGTATCCA      | 138                  | 60                  | 100                         | 0.997          |
| <i>ogn2</i>    | KM603668                | F: TGTTATTCTCCCATGGATCCTG<br>R: GATCCCCCGCTGCATCTGTGG    | 125                  | 60                  | 98                          | 0.998          |
| <i>igf1</i>    | AY996779                | F: TGTCTAGCGCTCTTTCCTTTCA<br>R: AGAGGGTGTGGCTACAGGAGATAC | 84                   | 60                  | 100                         | 0.995          |
| <i>tra</i>     | AF047467                | F: GAGGCCGGAGCCAAACAC<br>R: GCCGATATCATCCGACAGG          | 124                  | 60                  | 102                         | 0.988          |
| <i>trβ</i>     | AY246695                | F: ACCGACTGGAGCCCACACAG<br>R: CCTTCACCCACGCTGCACT        | 129                  | 60                  | 101                         | 0.992          |
| <i>rps18</i>   | AM490061                | F: AGGGTGTGGCAGACGTTAC<br>R: CTCTGCCTGTTGAGGAACC         | 164                  | 60                  | 96                          | 0.994          |
| <i>β-actin</i> | X89920                  | F: CCCTGCCCCACGCCATCC<br>R: TCTCGGCTGTGGTGGTGAAGG        | 94                   | 60                  | 86                          | 0.994          |
| <i>18s</i>     | Pinto et al., 2010      | F: TGACGGAAGGGCACCACAG<br>R: AATCGTCCACCACTAAGAACGG      | 82                   | 60                  | 93.6                        | 0.992          |

<sup>a</sup>Annealing temperature; <sup>b</sup>qPCR efficiency.

experiment for each of the parameters analyzed (biometric, plasma, vertebrae TRAP and ALP, vertebrae minerals, and gene expression). Bonferroni adjustment was used for pairwise comparisons to identify any significant differences between different thermal history groups maintained at 23±1°C or between different thermal history groups exposed to a cold challenge (13±1°C) for each of the parameters analyzed. Any significant differences between fish from the same thermal regime maintained at 23±1°C or exposed to a cold challenge (13±1°C) was also identified. Dunnett's pairwise comparison was conducted for qPCR results to identify any significant difference between the control group (LT at 23±1°C) and the other groups. log<sub>10</sub> transformation of the data was used whenever necessary to achieve either normal distribution or equal variance assumptions. Data is presented as means±s.e.m., unless otherwise stated. In Tables S1–S4 we provide all pairwise comparison for each of the parameters analyzed.

## RESULTS

### Biometric parameters

Two-way ANOVA revealed that body mass and length of adult fish were affected by thermal history ( $P<0.001$ ), whereas condition factor  $K$  was affected by cold temperature challenge ( $P<0.01$ ; Table 1). HSI was affected by both thermal history and the temperature challenge ( $P<0.001$ ), and also by the interaction between both factors ( $P<0.01$ ).

Fish from the LHT group were significantly heavier and larger ( $P<0.001$ ) than fish from other thermal groups irrespective of water temperature. However, no significant covariation was detected between body mass and the other physiological parameters monitored. Fish exposed to a cold temperature challenge (13±1°C) for 15 days had a significantly higher HSI ( $P<0.01$ , LT and LHT;  $P<0.001$ , HLT and HT) than those maintained at 23±1°C irrespective of their thermal history. The condition factor  $K$  did not differ significantly between fish with the same thermal history maintained at 23±1°C or exposed to 13±1°C. The exception was the LT fish, in which  $K$  was significantly ( $P<0.05$ ) lower in the cold-challenged (13±1°C) group relative to the fish maintained at 23±1°C. No significant differences were found by the end of the experiment in the mass or length of fish from the same thermal history maintained at 23°C or exposed to 13°C for 15 days.

### Characterization of the physiological response to cold stress

#### Plasma cortisol

Two-way ANOVA revealed that plasma cortisol levels were significantly affected by thermal history ( $P<0.001$ ), temperature challenge ( $P<0.001$ ) and the interaction between these two factors ( $P<0.001$ ; Fig. 2). However, no significant differences in plasma cortisol concentrations were detected between LT, LHT, HT and HLT fish maintained at 23±1°C, although values ranged between 60.3±16.6 ng ml<sup>-1</sup> (HT) and 85.0±11.8 ng ml<sup>-1</sup> (LHT; Fig. 2). However, at 13±1°C, HLT fish had significantly ( $P<0.001$ ) higher levels of plasma cortisol (108.4±25.24 ng ml<sup>-1</sup>) relative to LT, LHT and HT fish, and LT fish had significantly ( $P<0.05$ ) higher levels of plasma cortisol (35.0±12.2 ng ml<sup>-1</sup>) relative to the LHT fish (1.5±0.36 ng ml<sup>-1</sup>). The LT, LHT and HT fish exposed to a cold challenge (13±1°C) had significantly ( $P<0.01$ ) lower levels of plasma cortisol than the equivalent group of fish maintained at 23±1°C.

#### Plasma glucose

Two-way ANOVA revealed that the interaction between thermal history and temperature challenge significantly ( $P=0.02$ ) affected the concentration of plasma glucose (Fig. 2). Comparison of plasma glucose levels of the LT, LHT, HT and HLT fish maintained at 23±1°C revealed no significant differences between groups. Similarly, the plasma glucose concentrations in LT, LHT, HT and HLT fish exposed to a cold challenge (13±1°C) did not differ. Comparison of fish with the same thermal history revealed that the concentration of plasma glucose increased significantly ( $P<0.01$ ) in the HLT group exposed to a cold temperature challenge (7.8±0.43 mmol l<sup>-1</sup>) relative to those maintained at 23±1°C (5.9±0.49 mmol l<sup>-1</sup>).

#### Plasma Na<sup>+</sup>, K<sup>+</sup>, protein and osmolality

Na<sup>+</sup> and K<sup>+</sup> plasma concentrations were significantly ( $P<0.05$  and  $P<0.01$ , respectively) affected by thermal history and the cold temperature challenge, whereas protein and osmolality were only significantly ( $P<0.001$  and  $P<0.05$ , respectively) affected by a cold challenge (Table 3). Plasma Na<sup>+</sup> was also significantly ( $P<0.001$ ) affected by the interaction between both factors. Plasma Na<sup>+</sup>, K<sup>+</sup>, protein and osmolality in LT, LHT, HT and HLT fish

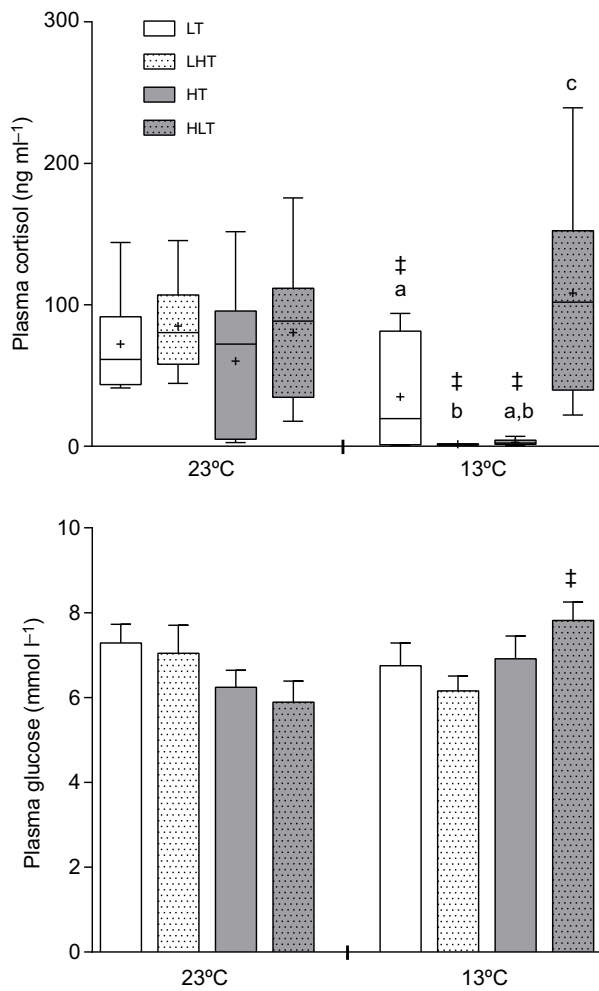

**Fig. 2. Cortisol and glucose plasma levels.** The stress-related parameters were analyzed in plasma samples from sea bream maintained in replicate tanks under control conditions (23°C,  $n=10$ /thermal history group) or under a cold challenge (13°C,  $n=10$ /thermal history group) for 15 days. The cortisol levels are plotted in a Tukey box plot and whiskers graph (with '+' representing the mean) and the results of glucose are shown as means  $\pm$  s.e.m. of the groups with different thermal history: LT (18–18°C); LHT (18–22°C); HT (22–22°C); HLT (22–18°C). Different letters indicate significant differences for cortisol levels between fish with a different thermal history maintained at the same temperature. †Significant differences of glucose levels between fish with the same thermal history maintained at different temperatures (23 or 13°C). Statistical significances (by two-way ANOVA) were set at  $P<0.05$ .

maintained at 23 $\pm$ 1°C were not significantly different (Table 3). Comparison of LT, LHT, HT and HLT fish exposed to a cold challenge (13°C) revealed that the HLT fish had significantly ( $P<0.01$ ) lower plasma Na<sup>+</sup> and K<sup>+</sup>. No significant differences were detected in the concentration of plasma Na<sup>+</sup>, K<sup>+</sup>, protein and osmolality when they were compared to fish with the same thermal history maintained at 23°C or exposed to a cold challenge (13 $\pm$ 1°C). The exception was the HLT fish, in which the concentration of plasma Na<sup>+</sup> and K<sup>+</sup> was significantly ( $P<0.001$  and  $P<0.01$ , respectively) lower in cold-challenged fish relative to those maintained at 23 $\pm$ 1°C. In the HLT group, plasma osmolality and protein were significantly ( $P<0.05$ ) higher in the cold-challenged fish relative to those maintained at 23 $\pm$ 1°C. Plasma calcium levels were not affected by thermal history or by a low temperature challenge.

**Table 3. Changes in plasma total protein, sodium, potassium, osmolality and total calcium in githead sea bream with different thermal histories maintained at 23 or 13°C for 15 days**

| Thermal history | Sodium (mmol l <sup>-1</sup> ) |                                   | Potassium (mmol l <sup>-1</sup> ) |                                 | Protein (mg ml <sup>-1</sup> ) |                                | Osmolality (mmol kg <sup>-1</sup> ) |                               | Calcium (mmol l <sup>-1</sup> ) |                |
|-----------------|--------------------------------|-----------------------------------|-----------------------------------|---------------------------------|--------------------------------|--------------------------------|-------------------------------------|-------------------------------|---------------------------------|----------------|
|                 | 23°C                           | 13°C                              | 23°C                              | 13°C                            | 23°C                           | 13°C                           | 23°C                                | 13°C                          | 23°C                            | 13°C           |
| LT              | 199.9 $\pm$ 3.76               | 187.1 $\pm$ 2.20 <sup>a,*</sup>   | 3.0 $\pm$ 0.21                    | 2.6 $\pm$ 0.16 <sup>a,b</sup>   | 24.1 $\pm$ 0.75                | 26.4 $\pm$ 0.98                | 364.4 $\pm$ 3.16                    | 368.6 $\pm$ 6.79              | 4.2 $\pm$ 0.04                  | 3.9 $\pm$ 0.28 |
| LHT             | 184.4 $\pm$ 6.04               | 183.7 $\pm$ 4.02 <sup>a</sup>     | 2.7 $\pm$ 0.16                    | 2.1 $\pm$ 0.18 <sup>a,b,*</sup> | 25.3 $\pm$ 0.64                | 27.5 $\pm$ 1.03                | 364.5 $\pm$ 4.84                    | 361.1 $\pm$ 3.67              | 4.0 $\pm$ 0.10                  | 4.0 $\pm$ 0.12 |
| HT              | 184.5 $\pm$ 2.99               | 184.2 $\pm$ 2.39 <sup>a</sup>     | 2.7 $\pm$ 0.21                    | 2.7 $\pm$ 0.11 <sup>a</sup>     | 23.9 $\pm$ 0.77                | 28.6 $\pm$ 1.03 <sup>***</sup> | 361.1 $\pm$ 5.59                    | 373.0 $\pm$ 6.18              | 4.0 $\pm$ 0.15                  | 3.8 $\pm$ 0.15 |
| HLT             | 198.6 $\pm$ 5.44               | 159.5 $\pm$ 3.91 <sup>b,***</sup> | 2.8 $\pm$ 0.21                    | 2.0 $\pm$ 0.12 <sup>b,**</sup>  | 24.7 $\pm$ 0.62                | 27.4 $\pm$ 0.92 <sup>*</sup>   | 359.0 $\pm$ 3.35                    | 374.6 $\pm$ 4.36 <sup>*</sup> | 4.0 $\pm$ 0.11                  | 3.5 $\pm$ 0.24 |

Replicate tanks were used per treatment but, for statistical analysis, the data per replicate were pooled as no significant differences were detected (23°C,  $n=10$ /thermal history; 13°C,  $n=10$ /thermal history). Different letters indicate significant differences for a given parameter between fish with a different thermal history maintained at the same temperature. Asterisks denote significant differences between fish with the same thermal history maintained at different temperatures (23 or 13°C): \* $P<0.05$ ; \*\* $P<0.01$ ; \*\*\* $P<0.001$ . The results are shown as means  $\pm$  s.e.m.; two-way ANOVA;  $P<0.05$ .

### Characterization of bone metabolism in response to cold stress TRAP and ALP activity in vertebrae

Two-way ANOVA indicated that a cold challenge significantly ( $P<0.001$ ) impacted on the TRAP and ALP activities in bone, and that the ALP activity was also significantly ( $P<0.01$ ) affected by thermal history (Fig. 3). Comparison of TRAP activity in the haemal vertebrae of the LT, LHT, HT and HLT fish maintained at  $23\pm 1^\circ\text{C}$  revealed no significant differences between groups. The ALP activity in the vertebrae of LT and HLT fish was significantly ( $P=0.009$ ) higher than the HT fish maintained at  $23\pm 1^\circ\text{C}$ . The cold challenge ( $13\pm 1^\circ\text{C}$ ) failed to cause a significant difference in either ALP or TRAP activities when LT, LHT, HT and HLT fish were

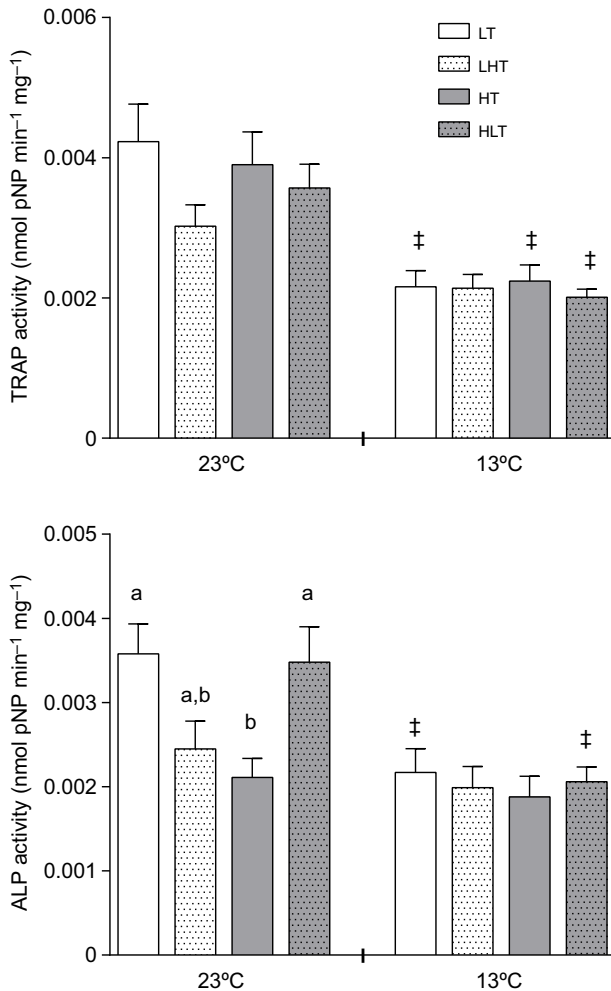

**Fig. 3. Effects of low temperature challenge on biochemical markers of bone remodelling.** Levels of alkaline phosphatase (ALP) and tartrate-resistant acid phosphatase (TRAP) were measured in vertebral bone of sea bream with different thermal histories in the control ( $23^\circ\text{C}$ ,  $n=10$ /thermal history group) and cold-challenged ( $13^\circ\text{C}$ ,  $n=10$ /thermal history group) groups 15 days after acclimation to the temperatures. The results of the replicate tanks/treatment were pooled for statistical analysis as no significant differences were found. The results obtained for fish from each thermal regime, LT ( $18\text{--}18^\circ\text{C}$ ), LHT ( $18\text{--}22^\circ\text{C}$ ), HT ( $22\text{--}22^\circ\text{C}$ ) and HLT ( $22\text{--}18^\circ\text{C}$ ), are represented. Different letters indicate significant differences for ALP activity between fish with a different thermal history maintained at the same temperature. ‡Significant differences between fish with the same thermal history maintained under control conditions ( $23^\circ\text{C}$ ) or exposed to a cold challenge ( $13^\circ\text{C}$ ). The results are shown as means $\pm$ s.e.m. of para-nitrophenol (pNP) production ( $\text{nmol pNP min}^{-1} \text{mg}^{-1}$ ). Statistical significances (by two-way ANOVA) were set at  $P<0.05$ .

compared. Comparison of fish with the same thermal history revealed that a cold challenge caused a significant ( $P=0.001$ ) decrease in the ALP activities of the LT and HLT groups relative to fish maintained at  $23\pm 1^\circ\text{C}$ . Similarly, the TRAP activity of the vertebrae of fish with the same thermal history that were exposed to a cold challenge was significantly ( $P<0.01$ ) lower in the LT, HLT and HT groups relative to those maintained at  $23\pm 1^\circ\text{C}$ . No significant differences in the TRAP:ALP ratio (data not shown) were detected in fish with the same thermal history that were maintained at  $23\pm 1^\circ\text{C}$  or exposed to a cold challenge of  $13\pm 1^\circ\text{C}$  for 15 days.

### Calcium content in vertebrae

Two-way ANOVA revealed a significant ( $P=0.02$ ) effect of thermal history on the calcium content of haemal vertebrae (Table 4). Comparison of the calcium content in the vertebrae of the LT, LHT, HT and HLT fish maintained at  $23\pm 1^\circ\text{C}$  revealed no significant differences between groups. Comparison of LT, LHT, HT and HLT fish exposed to a cold challenge ( $13\pm 1^\circ\text{C}$ ) revealed that the LHT fish had a significantly ( $P=0.03$ ) higher calcium content than fish of the LT regime. No significant differences in ash content of vertebrae were detected in fish with the same thermal history that were maintained at  $23\pm 1^\circ\text{C}$  or exposed to  $13\pm 1^\circ\text{C}$  for 15 days (Table 4).

### Gene expression in bone in response to cold stress

#### Transcripts of the bone matrix in vertebrae

Two-way ANOVA revealed that cold temperature challenge significantly ( $P<0.01$ ) modified the expression of bone matrix transcripts *ocn* and *ogn1* (Fig. 4). No significant differences in *ocn*, *ogn1* and *ogn2* were identified in the vertebrae of the LT, LHT, HT and HLT fish maintained at  $23\pm 1^\circ\text{C}$ . Transcripts of *ogn1* and *ogn2* were significantly ( $P<0.05$ ) upregulated in vertebrae of HLT relative to the LHT fish at  $13\pm 1^\circ\text{C}$ . In vertebrae of the cold-challenged HLT fish, *ocn* was significantly ( $P<0.05$ ) upregulated relative to the HT fish. Comparison of vertebrae from fish with the same thermal history indicated that a cold challenge caused a significant ( $P<0.05$ ) downregulation of *ogn1* and *ogn2* transcripts in the LHT fish, but no differences were detected in any of the other groups. In the LHT and HT groups, a cold challenge caused a significant ( $P<0.05$ ) downregulation of *ocn* transcripts in vertebrae compared with the same group maintained at  $23\pm 1^\circ\text{C}$ . Comparison of gene expression in vertebrae from cold-challenged LT, HLT, LHT and HT fish with the LT group at  $23\pm 1^\circ\text{C}$  (the temperature frequently used for larval culture; Mozes et al., 2011) revealed significant ( $P<0.05$ ) downregulation of transcripts for *ocn* in the HT fish and *ogn1* in the LT and LHT fish.

**Table 4. Calcium and ash content of vertebral bone**

| Thermal history | Calcium ( $\mu\text{mol mg}^{-1}$ ) |                                | Ash (mg)           |                    |
|-----------------|-------------------------------------|--------------------------------|--------------------|--------------------|
|                 | $23^\circ\text{C}$                  | $13^\circ\text{C}$             | $23^\circ\text{C}$ | $13^\circ\text{C}$ |
| LT              | 24.0 $\pm$ 0.86                     | 20.6 $\pm$ 0.36 <sup>a</sup>   | 0.26 $\pm$ 0.015   | 0.29 $\pm$ 0.010   |
| LHT             | 25.2 $\pm$ 1.63                     | 26.3 $\pm$ 1.59 <sup>b</sup>   | 0.28 $\pm$ 0.015   | 0.31 $\pm$ 0.011   |
| HT              | 22.4 $\pm$ 0.67                     | 25.4 $\pm$ 1.48 <sup>a,b</sup> | 0.30 $\pm$ 0.012   | 0.29 $\pm$ 0.010   |
| HLT             | 26.1 $\pm$ 1.88                     | 25.2 $\pm$ 1.31 <sup>a,b</sup> | 0.29 $\pm$ 0.019   | 0.30 $\pm$ 0.008   |

Results for gilthead sea bream with a different thermal history exposed to control conditions ( $23^\circ\text{C}$ ,  $n=10$ /thermal history group) or exposed to a temperature drop ( $13^\circ\text{C}$ ,  $n=10$ /thermal history group) 15 days after acclimation to the conditions. Different letters indicate significant differences for calcium between fish with a different thermal history maintained at the same temperature. The results are shown as means $\pm$ s.e.m.; two-way ANOVA;  $P<0.05$ .



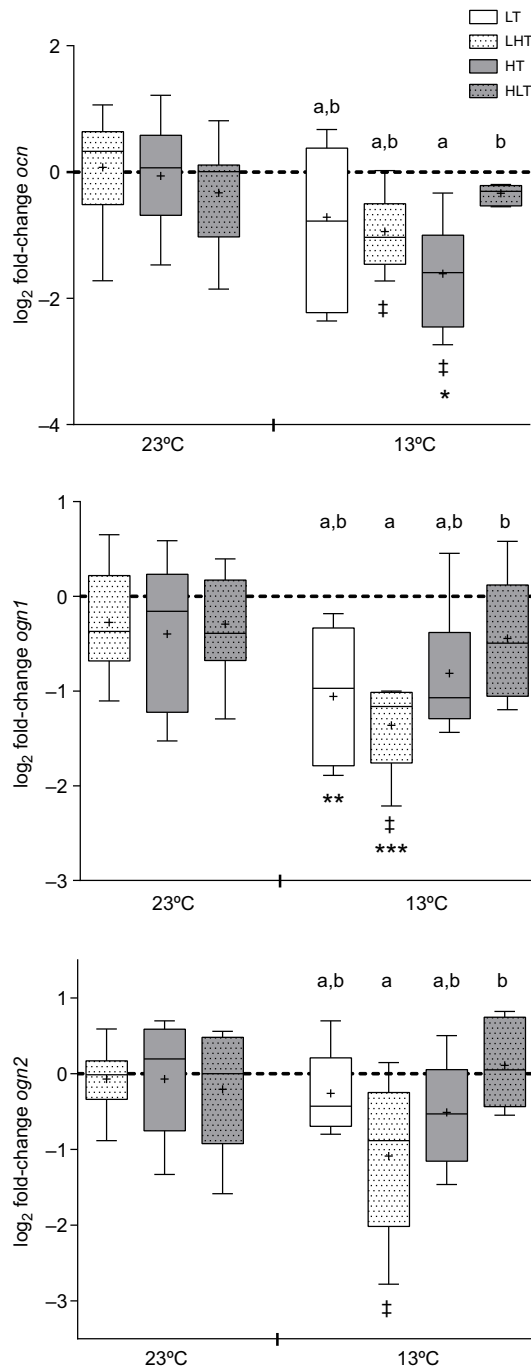

**Fig. 4. Relative expression of transcripts associated with the bone matrix: *ocn*, *ogn1* and *ogn2*.** Vertebral bone cDNA for each individual was analyzed by qPCR and normalized by the mean of *18s* expression: control group (23°C,  $n=10$ /thermal history group) and cold group (13°C,  $n=10$ /thermal history group). Results for each thermal history group are expressed as log<sub>2</sub> fold-change relative to the LT group (thermal history 18–18°C) maintained at 23°C, defined as control and not represented (corresponds to the baseline with fold change=0); results are represented in a Tukey box plot: LT (18–18°C); LHT (18–22°C); HT (22–22°C); HLT (22–18°C). '+' represents the mean. The results of the replicate tanks/treatment were pooled for statistical analysis as no significant differences were found between them. Different letters indicate significant differences between the thermal groups maintained at the same temperature. †Significant differences between fish with the same thermal history maintained under control conditions (23°C) or exposed to a cold challenge (13°C). Significant upregulation or downregulation relative to the control temperature (LT maintained at 23°C) is denoted by: \* $P<0.05$ , \*\* $P<0.01$ , \*\*\* $P<0.001$  using two-way ANOVA.

### Transcripts of regulatory factors in vertebrae

Two-way ANOVA revealed that, when fish with different thermal histories were exposed to a cold challenge, *gr* and *igf1* expression in vertebrae was modified due to a significant ( $P=0.001$ ) interaction between thermal history and low temperature challenge (Fig. 5). Similarly, *trα* and *trβ* expression was affected by the significant interaction ( $P<0.01$  and  $P=0.01$ , respectively) that occurred between thermal history and the cold temperature challenge (Fig. 5). *gr* and *trα* expression was also significantly ( $P<0.001$ ) affected by temperature challenge. Comparison of the transcript abundance of *igf1*, *trα* and *trβ* in vertebrae of LT, LHT, HT and HLT fish kept at 23±1°C revealed that they were similar irrespective of their thermal histories. In contrast, *gr* levels were significantly ( $P<0.05$ ) lower in vertebrae of the HLT fish relative to the LHT fish maintained at 23±1°C. In LT, LHT, HT and HLT fish exposed to a cold challenge (13±1°C), *gr* and *igf1* expression in vertebrae was significantly ( $P<0.01$ ) lower in LHT relative to HLT fish.

Comparison of fish with the same thermal history exposed to a cold temperature challenge revealed significant ( $P<0.05$ ) downregulation of *gr*, *igf1*, *trα* and *trβ* in vertebrae from the LHT fish relative to the fish maintained at 23±1°C. In the HT group, a cold challenge caused a significant ( $P<0.05$ ) downregulation of *gr* and *trα* in vertebrae relative to the same group maintained at 23±1°C.

Comparison of gene expression in vertebrae of the LT group maintained at 23±1°C (control fish) and the LT, HLT, LHT and HT fish that were exposed to cold challenge revealed significant ( $P<0.05$ ) downregulation of *igf1* expression in the LT and LHT fish, significant downregulation of *gr*, *trα* and *trβ* in the LHT fish ( $P<0.05$ ), and significant downregulation of *trα* in LT fish ( $P<0.05$ ).

### DISCUSSION

This study is the first to investigate the effect of early thermal history on the response of adult sea bream to a cold challenge and, more specifically, the potential change in bone activity and the bones likely response to the endocrine system in fish from different thermal regimes. When adult sea bream with different thermal histories were exposed to a cold water challenge, they had a different physiological response and overt differences in the stress axis was observed during the study. Significant differences in plasma parameters such as glucose, sodium, potassium, osmolality, protein and cortisol occurred between the experimental groups even before cold temperature exposure, suggesting that the early thermal regimes modified their physiology. The HLT thermal regime had the greatest impact on plasma parameters and was significantly different in adults of this group relative to the other thermal groups when they were challenged by a drop in water temperature. The early thermal history also significantly influenced the responsiveness of bone to a cold challenge (13±1°C) and adult fish from the LHT treatment were the most different from the other groups. In the LHT fish, a cold challenge caused a reduction in the relative abundance of the bone ECM transcripts *ocn*, *ogn1* and *ogn2*, and also transcripts linked with bone responsiveness, suggesting that thermal imprinting modified the bone.

### Thermal challenge and somatic indexes

In line with previous reports, a decrease in water temperature was associated with a significant reduction in feed intake, which is one of the first signs of cold stress (Tort et al., 2004). However, in the present study, irrespective of thermal history, the reduction in feed intake as a consequence of a drop in water temperature did not affect body mass or *K*, which was similar to the matched controls



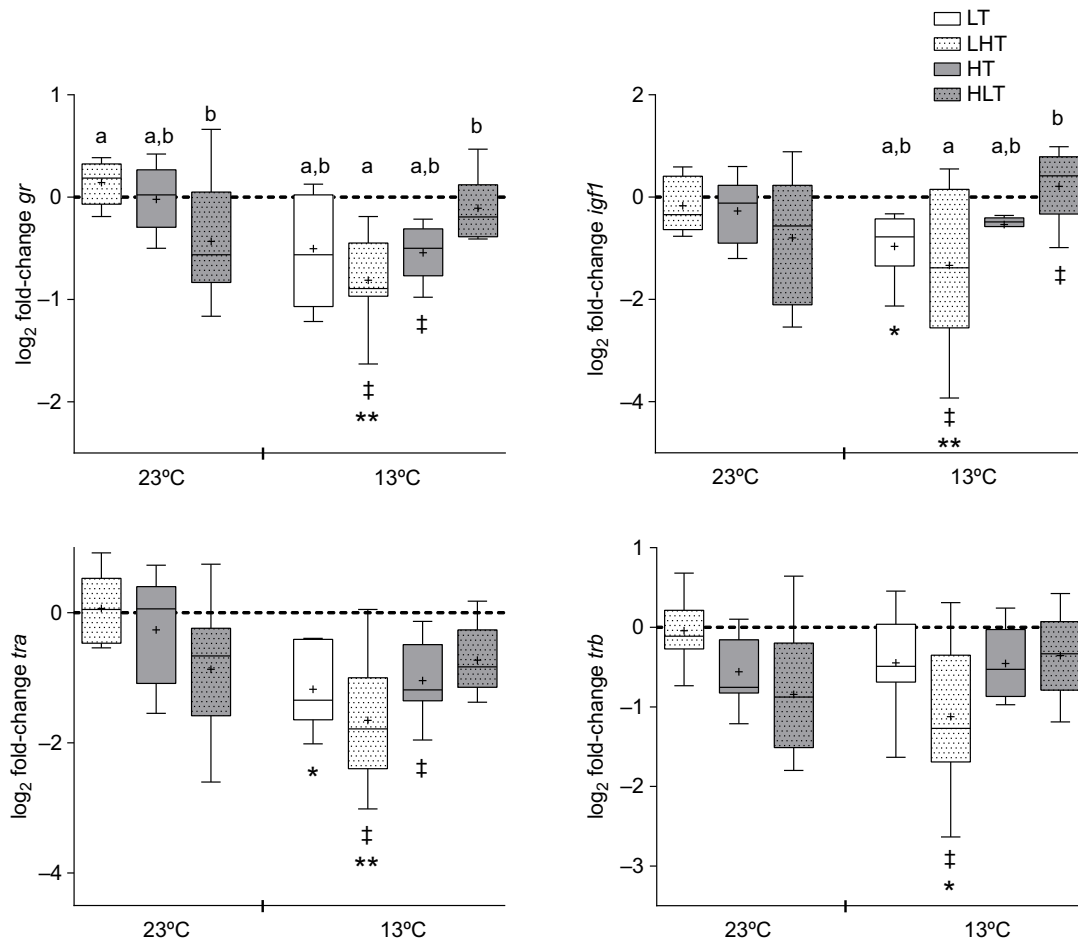

**Fig. 5. Relative expression of transcripts associated with endocrine responsiveness at low temperatures: *gr*, *igf1*, *tra* and *trb*.** Vertebral bone cDNA for each individual was analyzed by qPCR and normalized by the mean of *18s* expression: control group (23°C,  $n=10$ /thermal history) and cold group (13°C,  $n=10$ /thermal history group). Results for each thermal history group are expressed as  $\log_2$  fold-change relative to the LT group (thermal history 18–18°C) maintained at 23°C, defined as control and not represented (corresponds to the baseline with fold change=0); results are represented in a Tukey box plot: LT (18–18°C); LHT (18–22°C); HT (22–22°C); HLT (22–18°C). '+' represents the mean. The results of the replicate tanks/treatment were pooled for statistical analysis as no significant differences were found between them. Different letters indicate significant differences between the thermal groups maintained at the same temperature. \*Significant differences occurring between fish with the same thermal history maintained under control conditions (23°C) or exposed to a cold challenge (13°C). Significant upregulation or downregulation relative to the control (taken at the LT group maintained at 23°C) was denoted by: \* $P<0.05$ , \*\* $P<0.01$  using two-way ANOVA.

maintained at  $23\pm 1^\circ\text{C}$ . These results are in line with other studies of cold-challenged sea bream, in which body mass was not affected by low water temperatures (Tort et al., 2004), although HSI was increased as a consequence of the failure to mobilize fat stores (Ibarz et al., 2005, 2007). We propose that the maintenance of body mass and  $K$  in the present study indicates that sea bream were able to adjust their metabolism to compensate for the effects of a short-term (15 days) cold challenge, as has been shown for other fish (Hochachka and Somero, 1984). Our results contrast with previous studies in which sea bream were unable to maintain their body mass, presumably because the water temperature in previous studies was dropped to below  $10^\circ\text{C}$  and the fish totally stopped feeding (Ibarz et al., 2003). Overall, our results suggest that thermal imprinting did not influence the capacity of the sea bream to compensate their metabolism when water temperature was reduced.

#### Thermal challenge as a stressor

In the present study, the cortisol response at different time points during the experiment was not established and so it was not possible to confirm whether a drop in water temperature caused a transient

peak in cortisol as previously reported in the gilthead sea bream (Rotllant et al., 2000) and the Atlantic cod (*Gadus morhua*; Staurnes et al., 1994). Furthermore, increased plasma glucose (a secondary stress marker; Pottinger and Pickering, 1997) was only observed in the HLT group when fish were exposed to  $13^\circ\text{C}$  for 15 days. However, the results from several previous studies suggest that the development of hyperglycaemia in response to a cold challenge is variable in this species (Sala-Rabanal et al., 2003; Tort et al., 2004; Vargas-Chacoff et al., 2009). Notably, the only group that was hyperglycaemic in our experiments (the HLT group) was also the group that had significantly higher plasma cortisol ( $108.4 \pm 71.4 \text{ ng ml}^{-1}$ ). A positive correlation between plasma cortisol and glucose has been previously reported in Atlantic cod under cold stress (Staurnes et al., 1994). By the end of the cold challenge, a drastic reduction in plasma cortisol occurred in the LT, LHT and HT groups relative to the same thermal group maintained at  $23^\circ\text{C}$ , which is in agreement with the results of previous studies in the gilthead and silver sea bream (Deane and Woo, 2005; Rotllant et al., 2000). The results of the present study indicate that, in gilthead sea bream, thermal imprinting modified the cortisol response in adults

when they were exposed to a cold challenge, presumably through modifications in the stress axis. In fact, in a previous study, exposure to an acute stress challenge of slightly older fish (9 months old) from the same population of fish revealed that thermal imprinting caused significant changes in the central stress axis (Mateus et al., 2017).

The reference resting values for plasma cortisol in gilthead sea bream are between 1 and 10 ng ml<sup>-1</sup>, and for chronic (around 33 ±34.1 ng ml<sup>-1</sup>) and acute (162±101.8 ng ml<sup>-1</sup>) stress (Tort, et al., 2011) are significantly higher. Surprisingly, plasma cortisol levels in fish maintained at 23°C under standard experimental conditions were characteristic of a stress response. The elevated cortisol levels may have been a result of the acute stress of capture and handling (Laidley and Leatherland, 1988; Molinero et al., 1997) even though we endeavoured to minimize stress during sampling. The results tend to suggest that the stress response in the 13°C challenged LT, LHT and HT groups was suppressed, although the mechanism by which this occurred was not established in the present study and will be a target for future studies.

The present study confirmed the hypothesis raised by others (Beitinger et al., 2000; Somero, 2005) that thermal history influences thermal tolerance in adult fish. To our knowledge, only one other study has investigated the effects of thermal history on the thermal tolerance of adult fish and it involved exposing zebrafish to high water temperatures (Schaefer and Ryan, 2006), but did not assess how the challenge modified physiological and endocrine systems. The results of our study confirm the general notion that non-lethal stress in early life may modify whole animal physiology and favour improved acclimation to stressors in later life (Jones, 2012). However, the results of our study indicate that the characteristics and timing of the stress, in this case temperature, may play a crucial role in determining the impact on adult physiology. For example, the physiological response of the LHT and HLT groups of gilthead sea bream to a low temperature challenge differed. At the end of the cold challenge, the HLT fish had higher glucose and cortisol levels, whereas the LHT fish had a suppressed cortisol response that reached the resting levels and plasma glucose levels were unchanged, which may suggest that LHT fish were more apt at acclimating to a low water temperature. This supports the notion that the embryonic stage may be a critical window of increased susceptibility to temperature-induced changes in fish development (Scott and Johnston, 2012; Skjærven et al., 2011).

### Thermal challenge and plasma parameters

A notable feature in the thermally imprinted fish was that, in two independent experiments with 7-month-old (present study) and 9-month-old (Mateus et al. 2017) thermally imprinted sea bream, the results for the plasma chemistry under control conditions (23±1°C) were similar. This suggests that thermal imprinting caused a persistent physiological change that was not affected by age or time of year.

A drop in water temperature has previously been reported to produce an imbalance in plasma chemistry, which can impact on a number of processes including metabolism and osmoregulation (Donaldson et al., 2008; Ibarz et al., 2010b; Rotllant et al., 2000). Previous studies have revealed that cold water challenge in gilthead sea bream caused an imbalance in plasma ions, most notably a reduction in plasma calcium, sodium and potassium levels (Gallardo et al., 2003; Rotllant et al., 2000; Sala-Rabanal et al., 2003; Vargas-Chacoff et al., 2009), and a significant increase in osmolality in juvenile turbot (*Scophthalmus maximus*; Imsland et al., 2003) and in tilapia hybrids (*Oreochromis mossambicus* × *O.*

*urolepis hornorum*; Sardella et al., 2004). The modified plasma ion profile in cold-challenged sea bream has been linked to a change in their osmoregulatory capacity resulting from a change in the morphology of the gill epithelium and a drastic reduction in gill, intestine and kidney Na<sup>+</sup>/K<sup>+</sup>-ATPase activity (Ibarz et al., 2010b). Overall, the results for plasma chemistry in the present study suggest that thermal imprinting had differing consequences for the osmoregulatory response to cold challenge in the gilthead sea bream. In particular, the thermal regimes associated with least change in plasma chemistry in response to a cold challenge was the LT and LHT groups, whereas, in contrast, the HLT group suffered a significant reduction in plasma sodium and potassium levels and a significant increase in osmolality relative to the matched group maintained at 23°C. The mechanism by which thermal imprinting modified plasma chemistry was not established in the present study, but may result from the changes induced by temperature in the developmental events occurring during embryo and early larval development (Yúfera et al., 2011).

Plasma levels of total protein were also modified in fish exposed to a cold challenge, and the HLT and HT groups at 13°C had significantly higher plasma protein levels than those of fish from the same thermal history maintained at 23°C. Field-based (Guijarro et al., 2003; Vargas-Chacoff et al., 2009) and laboratory (Gallardo et al., 2003) studies have previously reported increased total plasma protein concentrations during winter or under lower temperatures, respectively, as a result of increased β<sub>2</sub>- and γ-globulins (Cataldi et al., 1998; Gallardo et al., 2003). In the present study, only total plasma protein was measured and it remains to be established whether the increase in protein was linked to an increase in the γ-globulin fraction as previously reported (Gallardo et al., 2003). Nonetheless, the significant increase in plasma protein in the HT and HLT groups exposed to a cold challenge raises the possibility that early thermal history may modify the immune response in adult fish (Bizuayehu et al., 2015).

### Thermal challenge and bone homeostasis

To evaluate the impact of early thermal history on bone remodelling in adult sea bream maintained under optimal culture temperatures (23°C), we focused on the mineral content, the activity of the enzymes ALP and TRAP (Dimai et al., 1998; Persson et al., 1995), indicators of osteoblast and osteoclast activity, and typical transcripts of the bone. Transcripts included those encoding extracellular matrix (ECM) proteins, such as osteocalcin (OCN), a protein extremely abundant in the bone ECM that is a marker of late stage osteoblast differentiation and is essential for mineralization/remodelling (Fraser and Price, 1988; Karsenty and Oury, 2012; Lee et al., 2007), and osteoglycin (OGN1/2), a small leucine-rich proteoglycan found in the ECM of connective tissue and is an osteoinductive factor in cows (Bentz et al., 1989; Iozzo, 1997) and is associated with osteoblast differentiation (Kukita et al., 1990; Tanaka et al., 2012). Thermal history did not substantially affect basal bone homeostasis in unchallenged gilthead sea bream: the abundance of ECM transcripts and hormone receptors were similar in all experimental groups. The exception was ALP enzymatic activity, which was much lower in the HT fish, suggesting that their bone remodelling may be modified relative to the other fish, although the reduction of ALP in HT was not linked to modified plasma cortisol, a factor known to suppress ALP in humans (van Straalen et al., 1991).

The vertebral bone in gilthead sea bream from different thermal histories had a different response to a cold challenge and the enzymatic activities of TRAP and ALP, and ECM and hormone

receptor transcript abundance were modified. The reduction in temperature associated with cold challenge caused a simultaneous reduction in ALP and TRAP enzyme activity in fish of the LT and HLT groups. However, only fish from the LT group also had a decrease in bone calcium content and a significant downregulation of *ogn1*, which in other studies has been shown to be indicative of modified bone remodelling in fish (Pombinho et al., 2004) and rat (Goto and Tsukamoto, 2003). Although levels of ALP and TRAP in the LHT group exposed to 13°C were not significantly modified relative to the matched group at 23°C, *ocn* and *ogn1/2* were significantly downregulated, which is in line with the results of previous studies on fasted sea bream (Vieira et al., 2013) and type I diabetic mice (Botolin et al., 2005). These results may suggest that later stages of osteoblast differentiation were suppressed, whereas earlier stages were unaffected. Whether the changes observed in bone from fish with different thermal histories arose from epigenetic mechanisms was not established in this study. However, evidence exists that temperature during early development causes epigenetic modulation in the genome in teleosts (Bizuyehu et al., 2015; Campos et al., 2014). Furthermore, in Atlantic cod reared at different temperatures after hatching, the expression of miRNAs associated with bone activity was modified (Bizuyehu et al., 2015), and suggests a possible mechanism by which early rearing temperature can influence adult bone.

Bone is an emerging endocrine tissue (Blair et al., 2008) and also a target for a number of endocrine hormones, such as glucocorticoids, thyroid hormone and insulin-like growth factor, that regulate its turnover (Robson et al., 2002). The effect of a cold challenge on the responsiveness of bony tissue in ectotherms and particularly those with different early thermal histories has never been studied. Candidate transcript abundance was similar in all experimental groups at 23°C, suggesting that thermal imprinting did not appear to modify basal bone metabolism in adult sea bream. However, thermal imprinting changed the response of bone to a drop in water temperature, and *igf1*, associated with growth and bone turnover (Collins et al., 1998; Gabillard et al., 2005; Ono et al., 1996), *tra* and *trβ*, associated with bone resorption (Blair et al., 2008; Sbaihi et al., 2007), and *gr*, which mediates the effects of cortisol (Moutsatsou et al., 2012), were all significantly downregulated in vertebral bone of the LHT group. These results suggest that a drop in water temperature impairs the responsiveness of bone by repressing the transcription of these genes (Abbas et al., 2012; Larsen et al., 2001) and that this in turn impairs bone remodelling (Suzuki and Hattori, 2002). It would be of interest to directly measure the change in bone ECM proteins to assess the impact of thermal history and cold challenge on vertebral bone mass but, because neither antisera nor assays are currently available for fish, this was not possible. Nonetheless, an intriguing observation was that the groups with the most significant downregulation of bone matrix transcripts (LHT, LT and HT) also had the most notable downregulation of *gr*, *igf1*, *tra* and *trβ*. Although a simultaneous decrease in TRAP and ALP activity was detected in the HLT group, no modification was identified in bone calcium content and ECM transcript relative abundance, which may be justified by an unchanged endocrine response in the bone of fish of the HLT group. This observation is in line with previous studies that have revealed that disruption of endocrine signalling, including thyroid hormone in fish (Sbaihi et al., 2007; Takagi et al., 1994) and cortisol in fish (Sbaihi et al., 2009) and mice (Sher et al., 2006), modifies bone cell responsiveness to regulatory factors. Overall, although thermal imprinting failed to modify bone metabolism and responsiveness in optimal ambient water temperatures, it did

modify the response of bone to a cold challenge. Future studies should be directed at establishing the epigenetic mechanisms underlying this response.

#### Acknowledgements

The authors are extremely grateful to G. Macià, M. Matas, S. Molas and M. Monllà (IRTA) for their technical assistance in live prey production and gilthead sea bream larval and juvenile rearing, to Vera Gomes (CCMAR) for assistance in MP-AES analysis, and Elsa Couto for cortisol radioimmunoassay.

#### Competing interests

The authors declare no competing or financial interests.

#### Authors' contributions

Conceptualization: D.M.P.; Methodology: E.G., D.M.P.; Validation: A.P.M., P.I.S.P., D.M.P.; Formal analysis: A.P.M., D.M.P.; Investigation: A.P.M., R.C., D.M.P.; Resources: A.P.M., R.C., E.G., P.I.S.P., K.B.A., A.E., D.M.P.; Data curation: A.P.M., D.M.P.; Writing - original draft: A.P.M.; Writing - review & editing: E.G., P.I.S.P., K.B.A., A.E., D.M.P.; Visualization: A.P.M., D.M.P.; Supervision: D.M.P.; Project administration: D.M.P.; Funding acquisition: D.M.P.

#### Funding

This work was supported by the Seventh Framework Programme project Lifecycle (EU-FP7 222719). P.I.S.P. (SFRH/BPD/84033/2012) and R.C. (SFRH/BD/81625/2011) were supported by the Science Foundation of Portugal (Fundação para a Ciência e a Tecnologia, Multi/04326/2013).

#### Supplementary information

Supplementary information available online at <http://jeb.biologists.org/lookup/doi/10.1242/jeb.156174.supplemental>

#### References

- Abbas, H. H., Authman, M. M., Zaki, M. S. and Mohamed, G. F. (2012). Effect of Seasonal Temperature Changes on Thyroid Structure and Hormones Secretion of White Grouper (*Epinephelus aeneus*) in Suez Gulf, Egypt. *Life Sci J.* **9**, 700-705.
- Alami-Durante, H., Olive, N. and Rouel, M. (2007). Early thermal history significantly affects the seasonal hyperplastic process occurring in the myotomal white muscle of *Dicentrarchus labrax* juveniles. *Cell Tissue Res.* **327**, 553-570.
- Auperin, B. and Geslin, M. (2008). Plasma cortisol response to stress in juvenile rainbow trout is influenced by their life history during early development and by egg cortisol content. *Gen. Comp. Endocrinol.* **158**, 234-239.
- Baevefjord, G., Helland, S. and Hough, C. (2010). *Manual of Control of Malformations in Fish Aquaculture. Science and Practice*. Luxembourg: Federation of European Aquaculture Producers, RapidPress.
- Beitinger, T. L., Bennett, W. A. and McCauley, R. W. (2000). Temperature tolerances of North American freshwater fishes exposed to dynamic changes in temperature. *Environ. Biol. Fishes.* **58**, 237-275.
- Bentz, H., Nathan, R. M., Rosen, D. M., Armstrong, R. M., Thompson, A. Y., Segarini, P. R., Mathews, M. C., Dasch, J. R., Piez, K. A. and Seyedin, S. M. (1989). Purification and characterization of a unique osteoinductive factor from bovine bone. *J. Biol. Chem.* **264**, 20805-20810.
- Berthe, F. C. J., Michel, C. and Bernardet, J.-F. (1995). Identification of *Pseudomonas anguilliseptica* isolated from several fish species in France. *Dis. Aquat. Org.* **21**, 151.
- Bizuyehu, T. T., Johansen, S. D., Puvanendran, V., Toften, H. and Babiak, I. (2015). Temperature during early development has long-term effects on microRNA expression in Atlantic cod. *BMC Genomics.* **16**, 305.
- Blair, H. C., Zaidi, M., Huang, C. L. H. and Sun, L. (2008). The developmental basis of skeletal cell differentiation and the molecular basis of major skeletal defects. *Biol. Rev.* **83**, 401-415.
- Boglione, C. and Costa, C. (2011). Skeletal deformities and juvenile quality. In *Sparidae: Biology and Aquaculture of Gilthead Sea Bream and Other Species* (ed. M. A. Pavlidis and C. C. Mylonas), pp. 233-294. West Sussex: Wiley-Blackwell.
- Boglione, C., Gisbert, E., Gavaia, P., Witten, P. E., Moren, M., Fontagné, S. and Koumoundouros, G. (2013). Skeletal anomalies in reared European fish larvae and juveniles. Part 2: main typologies, occurrences and causative factors. *Rev. Aquacult.* **5**, S121-S167.
- Botolin, S., Faugere, M.-C., Malluche, H., Orth, M., Meyer, R. and McCabe, L. R. (2005). Increased bone adiposity and peroxisomal proliferator-activated receptor- $\gamma$ 2 expression in type I diabetic mice. *Endocrinology* **146**, 3622-3631.
- Campinho, M. A., Moutou, K. A. and Power, D. M. (2004). Temperature sensitivity of skeletal ontogeny in *Oreochromis mossambicus*. *J. Fish Biol.* **65**, 1003-1025.
- Campos, C., Sundaram, A. Y. M., Valente, L. M. P., Conceição, L. E. C., Engrola, S. and Fernandes, J. M. O. (2014). Thermal plasticity of the miRNA transcriptome during *Senegalese sole* development. *BMC Genomics* **15**, 525.



- Cataldi, E., Di Marco, P., Mandich, A. and Cataudella, S. (1998). Serum parameters of Adriatic sturgeon *Acipenser naccarii* (Pisces: Acipenseriformes): effects of temperature and stress. *Comp. Biochem. Physiol., Part A Mol. Integr. Physiol.* **121**, 351-354.
- Clarke, A. and Johnston, N. M. (1999). Scaling of metabolic rate with body mass and temperature in teleost fish. *J. Anim. Ecol.* **68**, 893-905.
- Collins, D., Woods, A., Herd, R., Blake, G., Fogelman, I., Wheeler, M. and Swaminathan, R. (1998). Insulin-like growth factor-I and bone mineral density. *Bone* **23**, 13-16.
- Davis, P. S. (1988). Two occurrences of the gilthead, *Sparus aurata* Linnaeus 1758, on the coast of Northumberland, England. *J. Fish Biol.* **33**, 951-951.
- Deane, E. E. and Woo, N. Y. S. (2005). Cloning and characterization of the hsp70 multigene family from silver sea bream: modulated gene expression between warm and cold temperature acclimation. *Biochem. Biophys. Res. Commun.* **330**, 776-783.
- Dimai, H. P., Linkhart, T. A., Linkhart, S. G., Donahue, L. R., Beamer, W. G., Rosen, C. J., Farley, J. R. and Baylink, D. J. (1998). Alkaline phosphatase levels and osteoprogenitor cell numbers suggest bone formation may contribute to peak bone density differences between two inbred strains of mice. *Bone* **22**, 211-216.
- Divanach, P., Boglione, C., Menu, B., Koumoundouros, G., Kentouri, M. and Cataudella, S. (1996). Abnormalities in finfish mariculture: an overview of the problem, causes and solutions. *Seabass and Seabream Culture: Problems and Prospects*. 45-66.
- Doherty, A. H., Ghalambor, C. K. and Donahue, S. W. (2015). Evolutionary physiology of bone: bone metabolism in changing environments. *Physiology* **30**, 17-29.
- Doménech, A., Fernández-Garayzábal, J. F., Lawson, P., García, J. A., Cutuli, M. T., Blanco, M., Gibello, A., Moreno, M. A., Collins, M. and Domínguez, L. (1997). Winter disease outbreak in sea-bream (*Sparus aurata*) associated with *Pseudomonas anguilliseptica* infection. *Aquaculture* **156**, 317-326.
- Donaldson, M. R., Cooke, S. J., Patterson, D. A. and Macdonald, J. S. (2008). Cold shock and fish. *J. Fish Biol.* **73**, 1491-1530.
- Fraser, J. and Price, P. (1988). Lung, heart, and kidney express high levels of mRNA for the vitamin K-dependent matrix Gla protein. Implications for the possible functions of matrix Gla protein and for the tissue distribution of the gamma-carboxylase. *J. Biol. Chem.* **263**, 11033-11036.
- Gabillard, J.-C., Weil, C., Rescan, P.-Y., Navarro, I., Gutierrez, J. and Le Bail, P.-Y. (2005). Does the GH/IGF system mediate the effect of water temperature on fish growth? A review. *Cybiuim*. **29**, 107-117.
- Gallardo, M. A., Sala-Rabanal, M., Ibarz, A., Padrós, F., Blasco, J., Fernández-Borrás, J. and Sánchez, J. (2003). Functional alterations associated with "winter syndrome" in gilthead sea bream (*Sparus aurata*). *Aquaculture* **223**, 15-27.
- Galloway, T. F., Kjørsvik, E. and Kryvi, H. (1999). Muscle growth and development in Atlantic cod larvae (*Gadus morhua* L.), related to different somatic growth rates. *J. Exp. Biol.* **202**, 2111-2120.
- García de la Serrana, D., Vieira, V. L. A., Andree, K. B., Darias, M., Estévez, A., Gisbert, E. and Johnston, I. A. (2012). Development temperature has persistent effects on muscle growth responses in gilthead sea bream. *PLoS ONE* **7**, e51884.
- Goto, A. and Tsukamoto, I. (2003). Increase in tartrate-resistant acid phosphatase of bone at the early stage of ascorbic acid deficiency in the ascorbate-requiring Osteogenic Disorder Shionogi (ODS) rat. *Calcif. Tissue Int.* **73**, 180-185.
- Greene, D. H. and Selivonchick, D. P. (1987). Lipid metabolism in fish. *Prog. Lipid Res.* **26**, 53-85.
- Guerreiro, P. M., Costa, R. and Power, D. M. (2013). Dynamics of scale regeneration in seawater- and brackish water-acclimated sea bass, *Dicentrarchus labrax*. *Fish Physiol. Biochem.* **39**, 917-930.
- Guijarro, A. I., Lopez-Patiño, M. A., Pinillos, M. L., Isorna, E., De Pedro, N., Alonso-Gómez, A. L., Alonso-Bedate, M. and Delgado, M. J. (2003). Seasonal changes in haematology and metabolic resources in the tench. *J. Fish Biol.* **62**, 803-815.
- Hall, B. K. (2005). *Bones and Cartilage: Developmental and Evolutionary Skeletal Biology*. London: Elsevier Academic Press.
- Hochachka, P. and Somero, G. (1984). *Biochemical Adaptation*. Princeton, New Jersey: Princeton Legacy Library.
- Ibarz, A., Fernández-Borrás, J., Blasco, J., Gallardo, M. and Sánchez, J. (2003). Oxygen consumption and feeding rates of gilthead sea bream (*Sparus aurata*) reveal lack of acclimation to cold. *Fish Physiol. Biochem.* **29**, 313-321.
- Ibarz, A., Blasco, J., Beltrán, M., Gallardo, M., Sánchez, J., Sala, R. and Fernández-Borrás, J. (2005). Cold-induced alterations on proximate composition and fatty acid profiles of several tissues in gilthead sea bream (*Sparus aurata*). *Aquaculture* **249**, 477-486.
- Ibarz, A., Beltrán, M., Fernández-Borrás, J., Gallardo, M. A., Sánchez, J. and Blasco, J. (2007). Alterations in lipid metabolism and use of energy depots of gilthead sea bream (*Sparus aurata*) at low temperatures. *Aquaculture* **262**, 470-480.
- Ibarz, A., Martín-Pérez, M., Blasco, J., Bellido, D., de Oliveira, E. and Fernández-Borrás, J. (2010a). Gilthead sea bream liver proteome altered at low temperatures by oxidative stress. *Proteomics* **10**, 963-975.
- Ibarz, A., Padrós, F., Gallardo, M. A., Fernández-Borrás, J., Blasco, J. and Tort, L. (2010b). Low-temperature challenges to gilthead sea bream culture: review of cold-induced alterations and 'Winter Syndrome'. *Rev. Fish Biol. Fish.* **20**, 539-556.
- Imslund, A. K., Gunnarsson, S., Foss, A. and Stefansson, S. O. (2003). Gill Na<sup>+</sup>, K<sup>+</sup>-ATPase activity, plasma chloride and osmolality in juvenile turbot (*Scophthalmus maximus*) reared at different temperatures and salinities. *Aquaculture* **218**, 671-683.
- Iozzo, R. V. (1997). The family of the small leucine-rich proteoglycans: key regulators of matrix assembly and cellular growth. *Crit. Rev. Biochem. Mol. Biol.* **32**, 141-174.
- Johnston, I. A., Lee, H.-T., Macqueen, D. J., Paranthaman, K., Kawashima, C., Anwar, A., Kinghorn, J. R. and Dalmay, T. (2009). Embryonic temperature affects muscle fibre recruitment in adult zebrafish: genome-wide changes in gene and microRNA expression associated with the transition from hyperplastic to hypertrophic growth phenotypes. *J. Exp. Biol.* **212**, 1781-1793.
- Jones, C. B. (2012). *Robustness, Plasticity, and Evolvability in Mammals: a Thermal Niche approach*. New York: Springer Science & Business Media.
- Jonsson, B. and Jonsson, N. (2014). Early environment influences later performance in fishes. *J. Fish Biol.* **85**, 151-188.
- Karsenty, G. and Oury, F. (2012). Biology without walls: the novel endocrinology of bone. *Annu. Rev. Physiol.* **74**, 87-105.
- Koumoundouros, G. (2010). Morpho-anatomical abnormalities in Mediterranean marine aquaculture. In *Recent Advances in Aquaculture Research* (ed. G. Koumoundouros), pp. 125-148. Kerala, India: Transworld Research Network.
- Koumoundouros, G., Divanach, P., Anezaki, L. and Kentouri, M. (2001). Temperature-induced ontogenetic plasticity in sea bass (*Dicentrarchus labrax*). *Mar. Biol.* **139**, 817-830.
- Kukita, A., Bonewald, L., Rosen, D., Seyedin, S., Mundy, G. R. and Roodman, G. D. (1990). Osteoinductive factor inhibits formation of human osteoclast-like cells. *Proc. Natl. Acad. Sci. USA* **87**, 3023-3026.
- Laidley, C. W. and Leatherland, J. F. (1988). Cohort sampling, anaesthesia and stocking-density effects on plasma cortisol, thyroid hormone, metabolite and ion levels in rainbow trout, *Salmo gairdneri* Richardson. *J. Fish Biol.* **33**, 73-88.
- Larsen, D. A., Beckman, B. R. and Dickhoff, W. W. (2001). The effect of low temperature and fasting during the winter on metabolic stores and endocrine physiology (insulin, insulin-like growth factor-I, and thyroxine) of coho salmon, *Oncorhynchus kisutch*. *Gen. Comp. Endocrinol.* **123**, 308-323.
- Lee, N. K., Sowa, H., Hinoi, E., Ferron, M., Ahn, J. D., Confavreux, C., Dacquin, R., Mee, P. J., McKee, M. D., Jung, D. Y. et al. (2007). Endocrine regulation of energy metabolism by the skeleton. *Cell* **130**, 456-469.
- Macqueen, D. J., Robb, D. H. F., Olsen, T., Melstveit, L., Paxton, C. G. M. and Johnston, I. A. (2008). Temperature until the 'eyed stage' of embryogenesis programmes the growth trajectory and muscle phenotype of adult Atlantic salmon. *Biol. Lett.* **4**, 294-298.
- Mateus, A. P., Costa, R. A., Cardoso, J. C. R., Andree, K. B., Estévez, A., Gisbert, E. and Power, D. M. (2017). Thermal imprinting modifies adult stress and innate immune responsiveness in the teleost sea bream. *J. Endocrinol.* **233**, 381-394.
- Molinero, A., Gómez, E., Balasch, J. and Tort, L. (1997). Stress by fish removal in the gilthead sea bream, *Sparus aurata*: a time course study on the remaining fish in the same tank. *J. Appl. Aquacult.* **7**, 1-12.
- Moutsatsou, P., Kassi, E. and Papavassiliou, A. G. (2012). Glucocorticoid receptor signaling in bone cells. *Trends Mol. Med.* **18**, 348-359.
- Mozen, N., Papandroulakis, N., Vergara, J. M., Biswas, A., Takii, K. and Ntatsopoulos, A. (2011). Production systems. In *Sparidae: Biology and Aquaculture of Gilthead Sea Bream and Other Species* (ed. M. Pavlidis and C. Mylonas), pp. 169-198. Oxford: Wiley-Blackwell.
- Ono, T., Kanzaki, S., Seino, Y., Baylink, D. and Mohan, S. (1996). Growth hormone (GH) treatment of GH-deficient children increases serum levels of insulin-like growth factors (IGFs), IGF-binding protein-3 and-5, and bone alkaline phosphatase isoenzyme. *J. Clin. Endocrinol. Metab.* **81**, 2111-2116.
- Padrós, F., Tort, L. and Crespo, S. (1996). Winter disease in the gilthead sea bream *Sparus aurata*: some evidence of a multifactorial etiology. In: (ed. B. Chatain). *Seabass and seabream culture: problems and prospects: handbook of contributions and short communications presented at the International Workshop on "Seabass and seabream culture: problems and prospects"* Verona, Italy, October 16-18, 1996 (pp. 305-307).
- Persson, P., Takagi, Y. and Björnsson, B. T. (1995). Tartrate resistant acid phosphatase as a marker for scale resorption in rainbow trout, *Oncorhynchus mykiss*: effects of estradiol-17 $\beta$  treatment and refeeding. *Fish Physiol. Biochem.* **14**, 329-339.
- Pinto, P. I. S., Teodosio, H. R., Galay-Burgos, M., Power, D. M., Sweeney, G. E. and Canario, A. V. M. (2006). Identification of estrogen-responsive genes in the testis of sea bream (*Sparus auratus*) using suppression subtractive hybridization. *Mol. Reprod. Dev.* **73**, 318-329.
- Pinto, P. I. S., Matsumura, H., Thorne, M. A. S., Power, D. M., Terauchi, R., Reinhardt, R. and Canario, A. V. M. (2010). Gill transcriptome response to changes in environmental calcium in the green spotted puffer fish. *BMC Genomics* **11**, 476.
- Polo, A., Yufera, M. and Pascual, E. (1991). Effects of temperature on egg and larval development of *Sparus aurata* L. *Aquaculture* **92**, 367-375.



- Pombinho, A. R., Laizé, V., Molha, D. M., Marques, S. M. and Cancela, M. L.** (2004). Development of two bone-derived cell lines from the marine teleost *Sparus aurata*; evidence for extracellular matrix mineralization and cell-type-specific expression of matrix Gla protein and osteocalcin. *Cell Tissue Res.* **315**, 393–406.
- Pottinger, T. and Pickering, A.** (1997). Genetic basis to the stress response: selective breeding for stress-tolerant fish. In *Fish Stress and Health in Aquaculture* (ed. G. K. Iwama, A. D. Pickering, J. P. Sumpter and C. B. Schreck), pp. 171–193. Cambridge, UK: Cambridge Univ. Press.
- Robson, H., Siebler, T., Shalet, S. M. and Williams, G. R.** (2002). Interactions between GH, IGF-I, glucocorticoids, and thyroid hormones during skeletal growth. *Pediatr. Res.* **52**, 137–147.
- Rotllant, J., Balm, P. H. M., Wendelaar-Bonga, S., Pérez-Sánchez, J. and Tort, L.** (2000). A drop in ambient temperature results in a transient reduction of interrenal ACTH responsiveness in the gilthead sea bream (*Sparus aurata*, L.). *Fish Physiol. Biochem.* **23**, 265–273.
- Rotllant, J., Guerreiro, P. M., Anjos, L., Redruello, B., Canario, A. V. M. and Power, D. M.** (2005). Stimulation of cortisol release by the N terminus of teleost parathyroid hormone-related protein in interrenal cells in vitro. *Endocrinology* **146**, 71–76.
- Sala-Rabanal, M., Sánchez, J., Ibarz, A., Fernández-Borràs, J., Blasco, J. and Gallardo, M. A.** (2003). Effects of low temperatures and fasting on hematology and plasma composition of gilthead sea bream (*Sparus aurata*). *Fish Physiol. Biochem.* **29**, 105–115.
- Sardella, B. A., Cooper, J., Gonzalez, R. J. and Brauner, C. J.** (2004). The effect of temperature on juvenile Mozambique tilapia hybrids (*Oreochromis mossambicus* x *O. urolepis hornorum*) exposed to full-strength and hypersaline seawater. *Comp. Biochem. Physiol., Part A Mol. Integr. Physiol.* **137**, 621–629.
- Sarusic, G.** (1999). Clinical signs of the winter disease phenomenon in sea bream (*Sparus aurata*, L.). *Bull. Eur. Assoc. Fish Pathol.* **19**, 113.
- Sbahi, M., Kacem, A., Aroua, S., Baloch, S., Rousseau, K., Lopez, E., Meunier, F. and Dufour, S.** (2007). Thyroid hormone-induced demineralisation of the vertebral skeleton of the eel, *Anguilla anguilla*. *Gen. Comp. Endocrinol.* **151**, 98–107.
- Sbahi, M., Rousseau, K., Baloch, S., Meunier, F., Fouchereau-Peron, M. and Dufour, S.** (2009). Cortisol mobilizes mineral stores from vertebral skeleton in the European eel: an ancestral origin for glucocorticoid-induced osteoporosis? *J. Endocrinol.* **201**, 241–252.
- Schaefer, J. and Ryan, A.** (2006). Developmental plasticity in the thermal tolerance of zebrafish *Danio rerio*. *J. Fish Biol.* **69**, 722–734.
- Scott, G. R. and Johnston, I. A.** (2012). Temperature during embryonic development has persistent effects on thermal acclimation capacity in zebrafish. *Proc. Natl. Acad. Sci. USA* **109**, 14247–14252.
- Sfakianakis, D. G., Leris, I., Laggis, A. and Kentouri, M.** (2011). The effect of rearing temperature on body shape and meristic characters in zebrafish (*Danio rerio*) juveniles. *Environ. Biol. Fishes.* **92**, 197–205.
- Sher, L. B., Harrison, J. R., Adams, D. J. and Cream, B. E.** (2006). Impaired cortical bone acquisition and osteoblast differentiation in mice with osteoblast-targeted disruption of glucocorticoid signaling. *Calcif. Tissue Int.* **79**, 118–125.
- Skjærven, K. H., Olsvik, P. A., Finn, R. N., Holen, E. and Hamre, K.** (2011). Ontogenetic expression of maternal and zygotic genes in Atlantic cod embryos under ambient and thermally stressed conditions. *Comp. Biochem. Physiol., Part A Mol. Integr. Physiol.* **159**, 196–205.
- Somero, G. N.** (2005). Linking biogeography to physiology: evolutionary and acclimatory adjustments of thermal limits. *Front. Zool.* **2**, 1–1.
- Somero, G. N.** (2010). The physiology of climate change: how potentials for acclimatization and genetic adaptation will determine ‘winners’ and ‘losers’. *The J. Exp. Biol.* **213**, 912–920.
- Staurnes, M., Rainuzzo, J. R., Sigholt, T. and Jørgensen, L.** (1994). Acclimation of Atlantic cod (*Gadus morhua*) to cold water: Stress response, osmoregulation, gill lipid composition and gill Na-K-ATPase activity. *Comp. Biochem. Physiol. A Physiol.* **109**, 413–421.
- Steinbacher, P., Marschallinger, J., Obermayer, A., Neuhofer, A., Sängler, A. M. and Stoiber, W.** (2011). Temperature-dependent modification of muscle precursor cell behaviour is an underlying reason for lasting effects on muscle cellularity and body growth of teleost fish. *J. Exp. Biol.* **214**, 1791–1801.
- Suzuki, N. and Hattori, A.** (2002). Melatonin suppresses osteoclastic and osteoblastic activities in the scales of goldfish. *J. Pineal Res.* **33**, 253–258.
- Takagi, Y.** (2001). Effects of starvation and subsequent refeeding on formation and resorption of acellular bone in tilapia, *Oreochromis niloticus*. *Zool. Sci.* **18**, 623–629.
- Takagi, Y., Hirano, J., Tanabe, H. and Yamada, J.** (1994). Stimulation of skeletal growth by thyroid hormone administrations in the rainbow trout, *Oncorhynchus mykiss*. *J. Exp. Zool.* **268**, 229–238.
- Takle, H., Baeverfjord, G., Lunde, M., Kolstad, K. and Andersen, Ø.** (2005). The effect of heat and cold exposure on HSP70 expression and development of deformities during embryogenesis of Atlantic salmon (*Salmo salar*). *Aquaculture* **249**, 515–524.
- Tanaka, K.-i., Matsumoto, E., Higashimaki, Y., Katagiri, T., Sugimoto, T., Seino, S. and Kaji, H.** (2012). Role of osteoglycin in the linkage between muscle and bone. *J. Biol. Chem.* **287**, 11616–11628.
- Tattersall, G. J., Sinclair, B. J., Withers, P. C., Fields, P. A., Seebacher, F., Cooper, C. E. and Maloney, S. K.** (2012). Coping with thermal challenges: physiological adaptations to environmental temperatures. *Compr. Physiol.* **2**, 2151–2202.
- Tort, L., Rotllant, J. and Rovira, L.** (1998). Immunological suppression in gilthead sea bream *Sparus aurata* of the North-West Mediterranean at low temperatures. *Comp. Biochem. Physiol., Part A Mol. Integr. Physiol.* **120**, 175–179.
- Tort, L., Rotllant, J., Liarte, C., Acerete, L., Hernández, A., Ceulemans, S., Coutteau, P. and Padros, F.** (2004). Effects of temperature decrease on feeding rates, immune indicators and histopathological changes of gilthead sea bream *Sparus aurata* fed with an experimental diet. *Aquaculture* **229**, 55–65.
- Tort, L., Pavlidis, M. and Woo, N. Y.** (2011). Stress and welfare in spard fishes. In *Sparidae: Biology and Aquaculture of Gilthead Sea Bream and Other Species* (ed. M. Pavlidis and C. Mylonas), pp. 75–94. Oxford: Wiley-Blackwell.
- van Straalen, J. P., Sanders, E., Prummel, M. F. and Sanders, G. T.** (1991). Bone-alkaline phosphatase as indicator of bone formation. *Clin. Chim. Acta.* **201**, 27–33.
- Vargas-Chacoff, L., Arjona, F. J., Ruiz-Jarabo, I., Páscoa, I., Gonçalves, O., Martín del Río, M. P. and Mancera, J. M.** (2009). Seasonal variation in osmoregulatory and metabolic parameters in earthen pond-cultured gilthead sea bream *Sparus auratus*. *Aquac. Res.* **40**, 1279–1290.
- Varsamos, S., Flik, G., Pepin, J.-F., Bonga, S. E. W. and Breuil, G.** (2006). Husbandry stress during early life stages affects the stress response and health status of juvenile sea bass, *Dicentrarchus labrax*. *Fish Shellfish Immunol.* **20**, 83–96.
- Vieira, F. A., Pinto, P. I., Guerreiro, P. M. and Power, D. M.** (2012). Divergent responsiveness of the dentary and vertebral bone to a selective estrogen-receptor modulator (SERM) in the teleost *Sparus aurata*. *Gen. Comp. Endocrinol.* **179**, 421–427.
- Vieira, F. A., Thorne, M. A. S., Stueber, K., Darias, M., Reinhardt, R., Clark, M. S., Gisbert, E. and Power, D. M.** (2013). Comparative analysis of a teleost skeleton transcriptome provides insight into its regulation. *Gen. Comp. Endocrinol.* **191**, 45–58.
- Wang, Y. L., Boudington, R. K. and Doroshov, S. I.** (1987). Influence of temperature on yolk utilization by the white sturgeon, *Acipenser transmontanus*. *J. Fish Biol.* **30**, 263–271.
- Wiegand, M. D., Buchanan, L. G., Loewen, J. M. and Hewitt, C. M.** (1988). Effects of rearing temperature on development and survival of embryonic and larval goldfish. *Aquaculture* **71**, 209–222.
- Wood, C. M. and McDonald, D. G.** (1997). *Global Warming: Implications for Freshwater and Marine Fish*. Cambridge: Cambridge University Press.
- Yúfera, M., Conceição, L. E., Battaglene, S., Fushimi, H. and Kotani, T.** (2011). Early development and metabolism. In *Sparidae: Biology and Aquaculture of Gilthead Sea Bream and other Species, Biology and Aquaculture of Gilthead Sea Bream and other Species* (ed. M. Pavlidis and C. Mylonas), pp. 133–168. West Sussex: Wiley-Blackwell.
- Zohar, Y., Abraham, M. and Gordin, H.** (1978). The gonadal cycle of the captivity-reared hermaphroditic teleost *Sparus aurata* (L.) during the first two years of life. *Ann. Biol. Anim. Biochim. Biophys.* **18**, 877–882.
